# Supplementary material
Source: PubMed Central journal article supplement (PMC2650177)
Supplement: 0808902106_0808902106SI.pdf [file 0808902106_0808902106SI.pdf]

# Supporting Information

Kurihara *et al.* 10.1073/pnas.0808902106

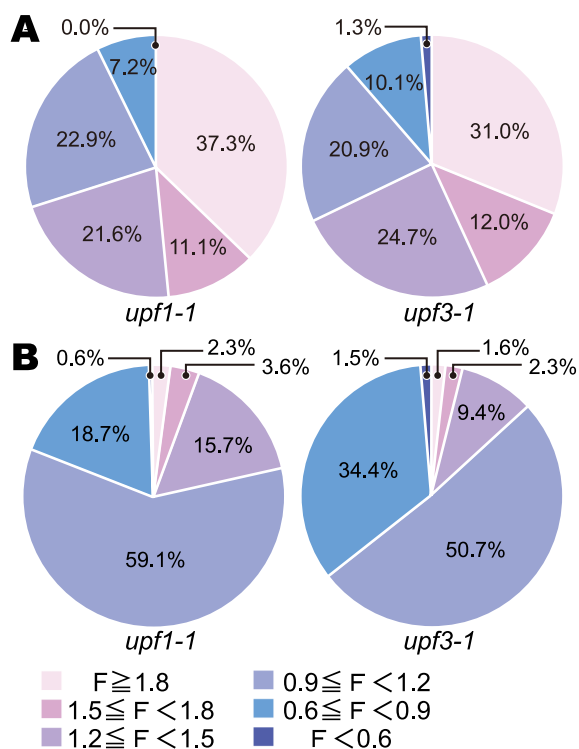

**Fig. S1.** Classification of the AGI-annotated transcripts based on fold changes. (A) Classification of the expressed miRNAs with AGI codes ( $P$  initial  $\leq 10^{-8}$ ) into 6 groups based on the fold changes. (B) Classification of the expressed AGI-annotated protein-coding transcripts ( $P$  initial  $\leq 10^{-8}$ ) into 6 groups based on the fold changes.

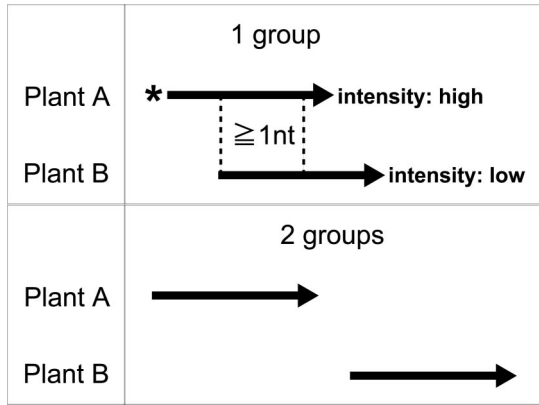

**Fig. S2.** Illustration of the grouping of non-AGI TUs among Plant A and Plant B. Arrows indicate respective TUs. The non-AGI TUs overlapping each other by more than one base were classified into the same group. If the intensity of TU is higher in Plant A than in Plant B, the TU in Plant A is the group-representative TU as indicated by the asterisk. The non-AGI TUs that did not overlap were classified into two distinct groups.

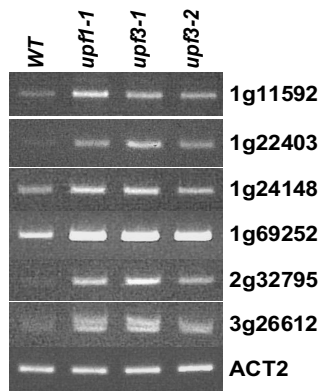

Fig. S3. Quantitative RT-PCR analysis of mlncRNAs in *upf3-2* mutants.

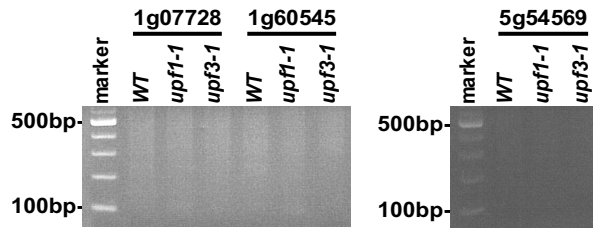

**Fig. S4.** Modified 5'RACE-based RT-PCR analysis to examine whether uncapped transcripts were targeted by NMD. We directly ligated the 5' adapter RNA oligo to the sample RNAs followed by quantitative RT-PCR.

Table S1. AGI-annotated transcripts up-regulated >1.8-fold in *upf1-1*

| Category <sup>†</sup> | AGI code <sup>‡</sup> | Fold change <sup>§</sup> |               | nat-RNA <sup>  </sup> | Other mlncRNA <sup>  </sup> | Overlap <sup>††</sup> | Sense gene <sup>††</sup> |
|-----------------------|-----------------------|--------------------------|---------------|-----------------------|-----------------------------|-----------------------|--------------------------|
|                       |                       | <i>Upf1-1</i>            | <i>Upf3-1</i> |                       |                             |                       |                          |
| Protein-coding        | AT1G01060.1           | 2.57                     | 2.19          |                       |                             | *                     |                          |
| Protein-coding        | AT1G01860.1           | 1.93                     | 2.92          |                       |                             | *                     |                          |
| Protein-coding        | AT1G02010.1           | 2.37                     | 1.66          |                       |                             |                       |                          |
| Protein-coding        | AT1G05680.1           | 2.05                     | 1.23          |                       |                             |                       |                          |
| Protein-coding        | AT1G06150.1           | 2.30                     | 2.92          |                       |                             | *                     |                          |
| Protein-coding        | AT1G06550.1           | 2.71                     | 2.30          |                       |                             |                       |                          |
| Protein-coding        | AT1G07010.1           | 3.31                     | 3.55          |                       |                             | *                     |                          |
| Protein-coding        | AT1G07640.1           | 2.01                     | 1.90          |                       |                             | *                     |                          |
| Protein-coding        | AT1G12750.1           | 2.68                     | 2.76          |                       |                             | *                     |                          |
| Protein-coding        | AT1G14560.1           | 1.82                     | 1.61          |                       |                             |                       |                          |
| Protein-coding        | AT1G15165.1           | 3.88                     | 3.27          |                       |                             | *                     |                          |
| Protein-coding        | AT1G18030.1           | 2.13                     | 1.85          |                       |                             |                       |                          |
| Protein-coding        | AT1G18570.1           | 2.34                     | 1.56          |                       |                             |                       |                          |
| Protein-coding        | AT1G21160.1           | 1.86                     | 1.57          |                       |                             |                       |                          |
| Protein-coding        | AT1G27760.1           | 2.43                     | 1.74          |                       |                             |                       |                          |
| Protein-coding        | AT1G29950.1           | 3.63                     | 3.02          |                       |                             | *                     |                          |
| Protein-coding        | AT1G31910.1           | 1.91                     | 1.67          |                       |                             |                       |                          |
| Protein-coding        | AT1G32940.1           | 2.81                     | 2.44          |                       |                             | *                     |                          |
| Protein-coding        | AT1G34270.1           | 1.88                     | 2.11          |                       |                             | *                     |                          |
| Protein-coding        | AT1G36730.1           | 3.33                     | 4.14          |                       |                             | *                     |                          |
| Protein-coding        | AT1G45160.1           | 1.80                     | 1.75          |                       |                             |                       |                          |
| Protein-coding        | AT1G49350.1           | 2.10                     | 1.48          |                       |                             |                       |                          |
| Protein-coding        | AT1G49790.1           | 1.91                     | 1.81          |                       |                             |                       |                          |
| Protein-coding        | AT1G50180.1           | 2.13                     | 1.69          |                       |                             |                       |                          |
| Protein-coding        | AT1G50300.1           | 1.88                     | 1.64          |                       |                             |                       |                          |
| Protein-coding        | AT1G50440.1           | 2.06                     | 2.11          |                       |                             | *                     |                          |
| Protein-coding        | AT1G51370.1           | 2.43                     | 2.62          |                       |                             | *                     |                          |
| Protein-coding        | AT1G55910.1           | 2.48                     | 2.61          |                       |                             | *                     |                          |
| Protein-coding        | AT1G56350.1           | 1.90                     | 1.31          |                       |                             |                       |                          |
| Protein-coding        | AT1G58160.1           | 4.63                     | 7.04          |                       |                             | *                     |                          |
| Protein-coding        | AT1G59620.1           | 3.20                     | 2.86          |                       |                             | *                     |                          |
| Protein-coding        | AT1G63230.1           | 2.36                     | 1.85          |                       |                             |                       |                          |
| Protein-coding        | AT1G64140.1           | 1.92                     | 2.08          |                       |                             | *                     |                          |
| Protein-coding        | AT1G64570.1           | 2.39                     | 1.73          |                       |                             |                       |                          |
| Protein-coding        | AT1G65840.1           | 2.74                     | 2.18          |                       |                             | *                     |                          |
| Protein-coding        | AT1G66540.1           | 2.98                     | 1.96          |                       |                             | *                     |                          |
| Protein-coding        | AT1G68890.1           | 2.34                     | 1.32          |                       |                             |                       |                          |
| Protein-coding        | AT1G70505.1           | 2.49                     | 1.88          |                       |                             |                       |                          |
| Protein-coding        | AT1G70790.1           | 3.15                     | 3.21          |                       |                             | *                     |                          |
| Protein-coding        | AT1G71696.1           | 2.22                     | 1.41          |                       |                             |                       |                          |
| Protein-coding        | AT1G71810.1           | 2.33                     | 2.09          |                       |                             | *                     |                          |
| Protein-coding        | AT1G72050.1           | 4.09                     | 2.04          |                       |                             |                       |                          |
| Protein-coding        | AT1G73170.1           | 1.85                     | 1.62          |                       |                             |                       |                          |
| Protein-coding        | AT1G73750.1           | 2.18                     | 1.86          |                       |                             |                       |                          |
| Protein-coding        | AT1G74170.1           | 2.07                     | 2.00          |                       |                             | *                     |                          |
| Protein-coding        | AT1G74370.1           | 1.88                     | 1.83          |                       |                             |                       |                          |
| Protein-coding        | <b>AT1G77840.1</b>    | 1.88                     | 1.37          |                       |                             |                       |                          |
| Protein-coding        | AT1G78450.1           | 3.14                     | 3.30          |                       |                             | *                     |                          |
| Protein-coding        | AT1G78690.1           | 2.19                     | 2.05          |                       |                             |                       |                          |
| Protein-coding        | AT1G78960.1           | 3.28                     | 2.57          |                       |                             | *                     |                          |
| Protein-coding        | AT2G01100.1           | 1.94                     | 1.88          |                       |                             |                       |                          |
| Protein-coding        | AT2G01330.1           | 3.34                     | 3.39          |                       |                             | *                     |                          |
| Protein-coding        | AT2G01390.1           | 1.87                     | 1.59          |                       |                             |                       |                          |
| Protein-coding        | AT2G04430.1           | 3.61                     | 2.80          |                       |                             | *                     |                          |
| Protein-coding        | AT2G04450.1           | 2.94                     | 2.47          |                       |                             | *                     |                          |
| Protein-coding        | AT2G06005.1           | 2.70                     | 1.84          |                       |                             |                       |                          |
| Protein-coding        | AT2G13790.1           | 1.83                     | 1.59          |                       |                             |                       |                          |
| Protein-coding        | AT2G14610.1           | 2.85                     | 1.28          |                       |                             |                       |                          |
| Protein-coding        | AT2G18560.1           | 2.37                     | 2.93          |                       |                             | *                     |                          |
| Protein-coding        | AT2G18680.1           | 2.75                     | 1.70          |                       |                             |                       |                          |
| Protein-coding        | AT2G20830.1           | 1.86                     | 1.59          |                       |                             |                       |                          |
| Protein-coding        | AT2G21370.1           | 2.06                     | 1.71          |                       |                             |                       |                          |
| Protein-coding        | AT2G24520.1           | 1.83                     | 1.62          |                       |                             |                       |                          |

| Category <sup>†</sup> | AGI code <sup>‡</sup> | Fold change <sup>§</sup> |               | nat-RNA <sup>¶</sup> | Other miRNA <sup>  </sup> | Overlap <sup>††</sup> | Sense gene <sup>‡‡</sup> |
|-----------------------|-----------------------|--------------------------|---------------|----------------------|---------------------------|-----------------------|--------------------------|
|                       |                       | <i>Upf1-1</i>            | <i>Upf3-1</i> |                      |                           |                       |                          |
| Protein-coding        | AT2G28605.1           | 2.43                     | 1.91          |                      |                           |                       |                          |
| Protein-coding        | AT2G32295.1           | 2.31                     | 1.61          |                      |                           |                       |                          |
| Protein-coding        | AT2G37630.1           | 3.05                     | 2.57          |                      |                           | *                     |                          |
| Protein-coding        | AT2G38185.1           | 2.36                     | 1.69          |                      |                           |                       |                          |
| Protein-coding        | AT2G38330.1           | 2.47                     | 2.28          |                      |                           | *                     |                          |
| Protein-coding        | AT2G41000.1           | 3.22                     | 2.17          |                      |                           |                       |                          |
| Protein-coding        | AT2G41080.1           | 1.81                     | 1.55          |                      |                           |                       |                          |
| Protein-coding        | AT2G41240.1           | 3.98                     | 1.01          |                      |                           |                       |                          |
| Protein-coding        | AT2G42955.1           | 2.73                     | 2.49          |                      |                           |                       |                          |
| Protein-coding        | AT2G44850.1           | 2.30                     | 2.14          |                      |                           | *                     |                          |
| Protein-coding        | AT2G45880.1           | 2.02                     | 1.07          |                      |                           |                       |                          |
| Protein-coding        | AT2G46320.1           | 2.73                     | 2.14          |                      |                           |                       |                          |
| Protein-coding        | AT2G47160.1           | 1.94                     | 1.62          |                      |                           |                       |                          |
| Protein-coding        | AT2G47490.1           | 3.30                     | 2.50          |                      |                           | *                     |                          |
| Protein-coding        | AT2G48000.1           | 1.89                     | 2.03          |                      |                           | *                     |                          |
| Protein-coding        | AT3G02830.1           | 2.11                     | 1.85          |                      |                           |                       |                          |
| Protein-coding        | AT3G03360.1           | 3.30                     | 2.74          |                      |                           | *                     |                          |
| Protein-coding        | AT3G06210.1           | 2.56                     | 2.56          |                      |                           | *                     |                          |
| Protein-coding        | <b>AT3G08730.1</b>    | 3.08                     | 3.00          |                      |                           | *                     |                          |
| Protein-coding        | AT3G09600.1           | 2.40                     | 2.03          |                      |                           |                       |                          |
| Protein-coding        | AT3G13190.1           | 2.57                     | 1.20          |                      |                           |                       |                          |
| Protein-coding        | AT3G15354.1           | 2.82                     | 1.71          |                      |                           |                       |                          |
| Protein-coding        | AT3G17830.1           | 2.15                     | 1.43          |                      |                           |                       |                          |
| Protein-coding        | AT3G18000.1           | 5.90                     | 4.78          |                      |                           | *                     |                          |
| Protein-coding        | AT3G18500.1           | 2.33                     | 1.95          |                      |                           | *                     |                          |
| Protein-coding        | AT3G20080.1           | 2.71                     | 1.91          |                      |                           | *                     |                          |
| Protein-coding        | AT3G20120.1           | 2.02                     | 2.13          |                      |                           | *                     |                          |
| Protein-coding        | AT3G21390.1           | 3.48                     | 3.29          |                      |                           | *                     |                          |
| Protein-coding        | AT3G23790.1           | 1.97                     | 1.80          |                      |                           |                       |                          |
| Protein-coding        | AT3G24070.1           | 2.84                     | 2.76          |                      |                           | *                     |                          |
| Protein-coding        | AT3G25430.1           | 1.82                     | 1.27          |                      |                           |                       |                          |
| Protein-coding        | AT3G26540.1           | 2.09                     | 1.82          |                      |                           | *                     |                          |
| Protein-coding        | AT3G26730.1           | 2.01                     | 1.70          |                      |                           |                       |                          |
| Protein-coding        | AT3G26950.1           | 1.83                     | 1.85          |                      |                           | *                     |                          |
| Protein-coding        | AT3G27940.1           | 4.28                     | 1.96          |                      |                           |                       |                          |
| Protein-coding        | AT3G29410.1           | 2.48                     | 1.38          |                      |                           |                       |                          |
| Protein-coding        | AT3G33530.1           | 1.86                     | 1.67          |                      |                           |                       |                          |
| Protein-coding        | AT3G45443.1           | 2.69                     | 3.48          |                      |                           | *                     |                          |
| Protein-coding        | AT3G47390.1           | 2.42                     | 1.53          |                      |                           |                       |                          |
| Protein-coding        | AT3G51110.1           | 1.81                     | 1.53          |                      |                           |                       |                          |
| Protein-coding        | AT3G51630.1           | 2.04                     | 1.66          |                      |                           |                       |                          |
| Protein-coding        | AT3G53240.1           | 5.18                     | 4.61          |                      |                           | *                     |                          |
| Protein-coding        | AT3G53400.1           | 5.24                     | 4.58          |                      |                           | *                     |                          |
| Protein-coding        | AT3G53830.1           | 1.89                     | 1.47          |                      |                           |                       |                          |
| Protein-coding        | AT3G54910.1           | 1.80                     | 1.77          |                      |                           |                       |                          |
| Protein-coding        | AT3G56080.1           | 2.13                     | 1.51          |                      |                           |                       |                          |
| Protein-coding        | AT3G56300.1           | 3.08                     | 2.25          |                      |                           | *                     |                          |
| Protein-coding        | AT3G56330.1           | 2.27                     | 1.41          |                      |                           |                       |                          |
| Protein-coding        | AT3G56840.1           | 2.02                     | 2.46          |                      |                           | *                     |                          |
| Protein-coding        | AT3G56970.1           | 2.45                     | 0.97          |                      |                           |                       |                          |
| Protein-coding        | AT3G56980.1           | 2.51                     | 0.89          |                      |                           |                       |                          |
| Protein-coding        | AT3G58940.1           | 1.91                     | 2.10          |                      |                           | *                     |                          |
| Protein-coding        | AT3G59780.1           | 1.91                     | 1.48          |                      |                           |                       |                          |
| Protein-coding        | AT3G60310.1           | 2.06                     | 1.94          |                      |                           | *                     |                          |
| Protein-coding        | AT4G00590.1           | 2.71                     | 2.49          |                      |                           | *                     |                          |
| Protein-coding        | AT4G00880.1           | 3.13                     | 2.02          |                      |                           |                       |                          |
| Protein-coding        | AT4G03060.1           | 2.95                     | 4.70          |                      |                           | *                     |                          |
| Protein-coding        | AT4G03260.1           | 2.49                     | 1.94          |                      |                           | *                     |                          |
| Protein-coding        | AT4G03635.1           | 2.72                     | 1.93          |                      |                           |                       |                          |
| Protein-coding        | AT4G05040.1           | 2.13                     | 1.79          |                      |                           |                       |                          |
| Protein-coding        | AT4G07825.1           | 1.95                     | 1.95          |                      |                           | *                     |                          |
| Protein-coding        | AT4G09180.1           | 2.10                     | 1.97          |                      |                           |                       |                          |
| Protein-coding        | AT4G09490.1           | 2.30                     | 2.33          |                      |                           |                       |                          |
| Protein-coding        | AT4G11000.1           | 2.18                     | 2.65          |                      |                           | *                     |                          |

| Category <sup>†</sup> | AGI code <sup>‡</sup> | Fold change <sup>§</sup> |               | nat-RNA <sup>¶</sup> | Other miRNA <sup>  </sup> | Overlap <sup>††</sup> | Sense gene <sup>††</sup> |
|-----------------------|-----------------------|--------------------------|---------------|----------------------|---------------------------|-----------------------|--------------------------|
|                       |                       | <i>Upf1-1</i>            | <i>Upf3-1</i> |                      |                           |                       |                          |
| Protein-coding        | AT4G13810.1           | 2.67                     | 2.87          |                      |                           | *                     |                          |
| Protein-coding        | AT4G15260.1           | 3.27                     | 4.91          |                      |                           | *                     |                          |
| Protein-coding        | AT4G15440.1           | 2.20                     | 2.15          |                      |                           | *                     |                          |
| Protein-coding        | AT4G18270.1           | 2.41                     | 1.97          |                      |                           | *                     |                          |
| Protein-coding        | AT4G19110.1           | 3.22                     | 2.58          |                      |                           | *                     |                          |
| Protein-coding        | AT4G23050.1           | 2.16                     | 1.85          |                      |                           | *                     |                          |
| Protein-coding        | AT4G24080.1           | 2.86                     | 1.94          |                      |                           |                       |                          |
| Protein-coding        | AT4G24790.1           | 1.82                     | 1.35          |                      |                           |                       |                          |
| Protein-coding        | AT4G24810.1           | 2.73                     | 2.37          |                      |                           | *                     |                          |
| Protein-coding        | AT4G25270.1           | 2.26                     | 2.89          |                      |                           | *                     |                          |
| Protein-coding        | AT4G25600.1           | 2.62                     | 2.71          |                      |                           | *                     |                          |
| Protein-coding        | AT4G26520.1           | 2.12                     | 2.08          |                      |                           | *                     |                          |
| Protein-coding        | AT4G26555.1           | 1.94                     | 2.16          |                      |                           | *                     |                          |
| Protein-coding        | AT4G26850.1           | 3.38                     | 2.55          |                      |                           | *                     |                          |
| Protein-coding        | <b>AT4G30680.1</b>    | 2.30                     | 2.76          |                      |                           | *                     |                          |
| Protein-coding        | AT4G30960.1           | 1.97                     | 1.92          |                      |                           | *                     |                          |
| Protein-coding        | AT4G32270.1           | 2.88                     | 2.73          |                      |                           | *                     |                          |
| Protein-coding        | AT4G33470.1           | 2.22                     | 2.19          |                      |                           | *                     |                          |
| Protein-coding        | <b>AT4G34020.1</b>    | 2.17                     | 2.30          |                      |                           | *                     |                          |
| Protein-coding        | AT4G34140.1           | 1.96                     | 1.23          |                      |                           |                       |                          |
| Protein-coding        | AT4G34310.1           | 1.85                     | 1.42          |                      |                           |                       |                          |
| Protein-coding        | AT4G36840.1           | 4.50                     | 4.47          |                      |                           | *                     |                          |
| Protein-coding        | AT4G39620.1           | 1.92                     | 1.95          |                      |                           |                       |                          |
| Protein-coding        | AT5G01450.1           | 2.60                     | 2.41          |                      |                           | *                     |                          |
| Protein-coding        | AT5G01510.1           | 2.11                     | 1.14          |                      |                           |                       |                          |
| Protein-coding        | AT5G01810.1           | 2.41                     | 2.19          |                      |                           | *                     |                          |
| Protein-coding        | AT5G02480.1           | 1.89                     | 1.77          |                      |                           |                       |                          |
| Protein-coding        | AT5G02650.1           | 3.80                     | 4.29          |                      |                           | *                     |                          |
| Protein-coding        | AT5G06180.1           | 1.82                     | 1.40          |                      |                           |                       |                          |
| Protein-coding        | AT5G07130.1           | 1.86                     | 1.68          |                      |                           |                       |                          |
| Protein-coding        | AT5G08030.1           | 2.08                     | 1.52          |                      |                           |                       |                          |
| Protein-coding        | AT5G08510.1           | 1.99                     | 2.40          |                      |                           | *                     |                          |
| Protein-coding        | AT5G08710.1           | 2.39                     | 2.11          |                      |                           |                       |                          |
| Protein-coding        | AT5G09460.1           | 3.26                     | 2.82          |                      |                           | *                     |                          |
| Protein-coding        | AT5G15950.1           | 6.78                     | 2.97          |                      |                           | *                     |                          |
| Protein-coding        | AT5G16540.1           | 2.47                     | 2.31          |                      |                           | *                     |                          |
| Protein-coding        | AT5G17240.1           | 2.09                     | 1.44          |                      |                           |                       |                          |
| Protein-coding        | AT5G17670.1           | 2.06                     | 2.72          |                      |                           | *                     |                          |
| Protein-coding        | AT5G19400.1           | 2.52                     | 3.88          |                      |                           | *                     |                          |
| Protein-coding        | AT5G20070.1           | 2.10                     | 1.55          |                      |                           |                       |                          |
| Protein-coding        | AT5G20220.1           | 2.55                     | 2.11          |                      |                           | *                     |                          |
| Protein-coding        | AT5G20410.1           | 1.87                     | 1.70          |                      |                           |                       |                          |
| Protein-coding        | AT5G23490.1           | 2.01                     | 1.38          |                      |                           |                       |                          |
| Protein-coding        | AT5G24210.1           | 2.22                     | 1.76          |                      |                           |                       |                          |
| Protein-coding        | AT5G26270.1           | 1.99                     | 1.87          |                      |                           |                       |                          |
| Protein-coding        | AT5G27390.1           | 2.48                     | 2.01          |                      |                           |                       |                          |
| Protein-coding        | AT5G36940.1           | 3.73                     | 3.92          |                      |                           | *                     |                          |
| Protein-coding        | AT5G37260.1           | 3.21                     | 3.35          |                      |                           | *                     |                          |
| Protein-coding        | AT5G38590.1           | 1.90                     | 2.14          |                      |                           | *                     |                          |
| Protein-coding        | AT5G43930.1           | 1.97                     | 1.53          |                      |                           |                       |                          |
| Protein-coding        | AT5G44600.1           | 2.35                     | 1.99          |                      |                           |                       |                          |
| Protein-coding        | AT5G45430.1           | 7.30                     | 6.32          |                      |                           | *                     |                          |
| Protein-coding        | AT5G45650.1           | 2.01                     | 1.28          |                      |                           |                       |                          |
| Protein-coding        | AT5G47790.1           | 2.21                     | 2.29          |                      |                           | *                     |                          |
| Protein-coding        | <b>AT5G47880.1</b>    | 5.13                     | 2.58          |                      |                           | *                     |                          |
| Protein-coding        | AT5G48110.1           | 1.89                     | 1.25          |                      |                           |                       |                          |
| Protein-coding        | AT5G48330.1           | 2.55                     | 1.92          |                      |                           |                       |                          |
| Protein-coding        | AT5G48440.1           | 2.08                     | 2.11          |                      |                           | *                     |                          |
| Protein-coding        | AT5G49500.1           | 2.72                     | 2.10          |                      |                           |                       |                          |
| Protein-coding        | AT5G50180.1           | 2.14                     | 1.55          |                      |                           |                       |                          |
| Protein-coding        | AT5G51050.1           | 1.93                     | 1.48          |                      |                           |                       |                          |
| Protein-coding        | AT5G51540.1           | 2.15                     | 1.25          |                      |                           |                       |                          |
| Protein-coding        | AT5G52550.1           | 1.92                     | 2.14          |                      |                           | *                     |                          |
| Protein-coding        | AT5G53450.1           | 2.70                     | 1.70          |                      |                           |                       |                          |

| Category <sup>†</sup> | AGI code <sup>‡</sup> | Fold change <sup>§</sup> |               | nat-RNA <sup>¶</sup> | Other mlncRNA <sup>  </sup> | Overlap <sup>**</sup> | Sense gene <sup>**</sup>        |
|-----------------------|-----------------------|--------------------------|---------------|----------------------|-----------------------------|-----------------------|---------------------------------|
|                       |                       | <i>Upf1-1</i>            | <i>Upf3-1</i> |                      |                             |                       |                                 |
| Protein-coding        | AT5G53900.1           | 2.27                     | 2.20          |                      |                             | *                     |                                 |
| Protein-coding        | AT5G56990.1           | 2.86                     | 4.58          |                      |                             | *                     |                                 |
| Protein-coding        | AT5G59780.1           | 2.22                     | 1.77          |                      |                             |                       |                                 |
| Protein-coding        | AT5G64340.1           | 2.39                     | 2.71          |                      |                             | *                     |                                 |
| Protein-coding        | AT5G65450.1           | 2.40                     | 2.00          |                      |                             | *                     |                                 |
| Protein-coding        | AT5G66005.1           | 2.80                     | 3.04          |                      |                             | *                     |                                 |
| Protein-coding        | AT5G67610.1           | 1.82                     | 1.50          |                      |                             |                       |                                 |
| mlncRNA               | AT1G01448.1           | 1.87                     | 1.88          | *                    |                             | *                     | AT1G01450                       |
| mlncRNA               | AT1G07728.1           | 2.25                     | 2.58          | *                    |                             | *                     | AT1G07725                       |
| mlncRNA               | AT1G17255.1           | 1.80                     | 1.30          | *                    |                             |                       | AT1G17250                       |
| mlncRNA               | AT1G33415.1           | 3.60                     | 3.14          | *                    |                             | *                     | AT1G33420,<br>AT1G33430         |
| mlncRNA               | AT1G34844.1           | 2.96                     | 3.20          | *                    |                             | *                     | <b>AT1G34842</b>                |
| mlncRNA               | AT1G48315.1           | 3.22                     | 3.62          | *                    |                             | *                     | AT1G48320                       |
| mlncRNA               | AT1G51645.1           | 2.28                     | 1.91          | *                    |                             | *                     | AT1G51640                       |
| mlncRNA               | AT1G60505.1           | 2.16                     | 2.26          | *                    |                             | *                     | <b>AT1G60510</b>                |
| mlncRNA               | AT1G60525.1           | 3.17                     | 2.80          | *                    |                             |                       | AT1G60530                       |
| mlncRNA               | AT1G60545.1           | 2.63                     | 1.98          | *                    |                             | *                     | <b>AT1G60540</b>                |
| mlncRNA               | AT1G67792.1           | 3.25                     | 2.82          | *                    |                             | *                     | AT1G67790                       |
| mlncRNA               | AT1G69252.1           | 3.63                     | 4.04          |                      | **                          | *                     |                                 |
| mlncRNA               | AT1G72855.1           | 2.77                     | 3.40          | *                    |                             | *                     | AT1G72860                       |
| mlncRNA               | AT1G78265.1           | 1.91                     | 2.04          | *                    |                             |                       | AT1G78270                       |
| mlncRNA               | AT2G06002.1           | 5.93                     | 2.03          |                      | **                          |                       |                                 |
| mlncRNA               | AT2G24755.1           | 2.66                     | 3.31          | *                    |                             |                       | <b>AT2G24750,<br/>AT2G24760</b> |
| mlncRNA               | AT2G32795.1           | 4.65                     | 4.23          |                      | **                          |                       |                                 |
| mlncRNA               | AT2G35738.1           | 2.14                     | 2.30          | *                    |                             |                       | AT2G35740                       |
| mlncRNA               | AT2G36792.1           | 3.03                     | 2.51          | *                    |                             | *                     | AT2G36790                       |
| mlncRNA               | AT2G42247.1           | 2.08                     | 1.48          | *                    |                             |                       | AT2G42250                       |
| mlncRNA               | AT3G01142.1           | 2.33                     | 1.48          | *                    |                             |                       | AT3G01140                       |
| mlncRNA               | AT3G04485.1           | 3.09                     | 2.34          |                      | **                          |                       |                                 |
| mlncRNA               | AT3G26612.1           | 4.27                     | 3.98          |                      | **                          | *                     |                                 |
| mlncRNA               | AT3G27990.1           | 3.41                     | 2.71          |                      | **                          | *                     |                                 |
| mlncRNA               | AT3G56408.1           | 3.26                     | 3.72          | *                    |                             | *                     | AT3G56410                       |
| mlncRNA               | AT3G63445.1           | 3.04                     | 3.55          | *                    |                             | *                     | AT3G63440                       |
| mlncRNA               | AT4G04221.1           | 1.99                     | 1.43          | *                    |                             |                       | AT4G04220                       |
| mlncRNA               | AT4G26795.1           | 2.17                     | 1.57          | *                    |                             |                       | AT4G26790                       |
| mlncRNA               | AT4G37432.1           | 4.11                     | 4.60          | *                    |                             | *                     | AT4G37430                       |
| mlncRNA               | AT5G53048.1           | 4.60                     | 2.71          | *                    |                             | *                     | AT5G53050                       |
| mlncRNA               | AT5G54569.1           | 3.01                     | 3.65          | *                    |                             | *                     | AT5G54570                       |
| transposon            | AT2G10410.1           | 1.92                     | 1.76          |                      |                             |                       |                                 |
| transposon            | AT2G13970.1           | 3.92                     | 3.29          |                      |                             | *                     |                                 |
| transposon            | AT3G42658.1           | 3.72                     | 1.46          |                      |                             |                       |                                 |
| transposon            | AT4G04293.1           | 3.25                     | 3.97          |                      |                             | *                     |                                 |
| transposon            | AT4G28900.1           | 2.18                     | 1.79          |                      |                             |                       |                                 |
| transposon            | AT5G28626.1           | 3.28                     | 2.61          |                      |                             | *                     |                                 |
| transposon            | AT5G35777.1           | 2.47                     | 2.15          |                      |                             |                       |                                 |
| other                 | AT1G66725.1           | 2.33                     | 1.82          |                      |                             |                       |                                 |

<sup>†</sup>We classified the up-regulated AGI-annotated genes into 4 categories, protein-coding, mlncRNA, transposon, and other.

<sup>‡</sup>AGI-annotated genes. The genes marked by bold characters indicate exosome substrates reported previously (Chekanova JA, et al. (2007) Genome-wide high resolution mapping of exosome substrates reveals hidden feature in the *Arabidopsis* transcriptome. *Cell* 131:1340–1353).

<sup>§</sup>[Signal Intensity (HLE values) of each gene in *upf1-1* or *upf3-1*] ÷ [Signal Intensity (HLE values) of each gene in wild type].

<sup>¶</sup>Genes for nat-RNAs are marked by asterisks.

<sup>||</sup>Genes for other mlncRNA are marked by double asterisks.

<sup>\*\*</sup>Genes up-regulated in both *upf1-1* and *upf3-1* are marked by asterisks.

<sup>\*\*</sup>These represent the sense genes overlapping more than one base with nat-RNAs. The genes marked by bold characters encode transposons or pseudogenes.



**Table S2. AGI-annotated transcripts up-regulated >1.8-fold in *upf3-1***

| Category <sup>†</sup> | AGI code <sup>‡</sup> | Fold change <sup>§</sup> |               | nat-RNA <sup>  </sup> | Other mlncRNA <sup>  </sup> | Overlap <sup>††</sup> | Sense gene <sup>††</sup> |
|-----------------------|-----------------------|--------------------------|---------------|-----------------------|-----------------------------|-----------------------|--------------------------|
|                       |                       | <i>Upf3-1</i>            | <i>upf1-1</i> |                       |                             |                       |                          |
| Protein-coding        | AT1G01060.1           | 2.19                     | 2.57          |                       |                             | *                     |                          |
| Protein-coding        | AT1G01860.1           | 2.92                     | 1.93          |                       |                             | *                     |                          |
| Protein-coding        | AT1G05160.1           | 3.30                     | 1.74          |                       |                             |                       |                          |
| Protein-coding        | AT1G06150.1           | 2.92                     | 2.30          |                       |                             | *                     |                          |
| Protein-coding        | AT1G07010.1           | 3.55                     | 3.31          |                       |                             | *                     |                          |
| Protein-coding        | AT1G07640.1           | 1.90                     | 2.01          |                       |                             | *                     |                          |
| Protein-coding        | AT1G10610.1           | 2.53                     | 1.76          |                       |                             |                       |                          |
| Protein-coding        | AT1G12750.1           | 2.76                     | 2.68          |                       |                             | *                     |                          |
| Protein-coding        | AT1G14030.1           | 1.92                     | 1.45          |                       |                             |                       |                          |
| Protein-coding        | AT1G15165.1           | 3.27                     | 3.88          |                       |                             | *                     |                          |
| Protein-coding        | AT1G18773.1           | 3.92                     | 2.14          |                       |                             |                       |                          |
| Protein-coding        | AT1G29950.1           | 3.02                     | 3.63          |                       |                             | *                     |                          |
| Protein-coding        | AT1G32940.1           | 2.44                     | 2.81          |                       |                             | *                     |                          |
| Protein-coding        | AT1G34270.1           | 2.11                     | 1.88          |                       |                             | *                     |                          |
| Protein-coding        | AT1G36730.1           | 4.14                     | 3.33          |                       |                             | *                     |                          |
| Protein-coding        | AT1G50440.1           | 2.11                     | 2.06          |                       |                             | *                     |                          |
| Protein-coding        | AT1G51370.1           | 2.62                     | 2.43          |                       |                             | *                     |                          |
| Protein-coding        | AT1G53780.1           | 2.59                     | 1.29          |                       |                             |                       |                          |
| Protein-coding        | AT1G53785.1           | 2.14                     | 1.38          |                       |                             |                       |                          |
| Protein-coding        | AT1G55910.1           | 2.61                     | 2.48          |                       |                             | *                     |                          |
| Protein-coding        | AT1G58160.1           | 7.04                     | 4.63          |                       |                             | *                     |                          |
| Protein-coding        | AT1G59620.1           | 2.86                     | 3.20          |                       |                             | *                     |                          |
| Protein-coding        | AT1G64140.1           | 2.08                     | 1.92          |                       |                             | *                     |                          |
| Protein-coding        | AT1G64430.1           | 2.18                     | 1.79          |                       |                             |                       |                          |
| Protein-coding        | AT1G65840.1           | 2.18                     | 2.74          |                       |                             | *                     |                          |
| Protein-coding        | AT1G66540.1           | 1.96                     | 2.98          |                       |                             | *                     |                          |
| Protein-coding        | AT1G67300.1           | 1.81                     | 1.59          |                       |                             |                       |                          |
| Protein-coding        | AT1G70790.1           | 3.21                     | 3.15          |                       |                             | *                     |                          |
| Protein-coding        | AT1G71810.1           | 2.09                     | 2.33          |                       |                             | *                     |                          |
| Protein-coding        | AT1G74170.1           | 2.00                     | 2.07          |                       |                             | *                     |                          |
| Protein-coding        | AT1G78450.1           | 3.30                     | 3.14          |                       |                             | *                     |                          |
| Protein-coding        | AT1G78960.1           | 2.57                     | 3.28          |                       |                             | *                     |                          |
| Protein-coding        | AT2G01330.1           | 3.39                     | 3.34          |                       |                             | *                     |                          |
| Protein-coding        | AT2G04430.1           | 2.80                     | 3.61          |                       |                             | *                     |                          |
| Protein-coding        | AT2G04450.1           | 2.47                     | 2.94          |                       |                             | *                     |                          |
| Protein-coding        | AT2G18050.1           | 3.45                     | 2.78          |                       |                             |                       |                          |
| Protein-coding        | AT2G18560.1           | 2.93                     | 2.37          |                       |                             | *                     |                          |
| Protein-coding        | AT2G35130.1           | 1.84                     | 1.67          |                       |                             |                       |                          |
| Protein-coding        | AT2G37630.1           | 2.57                     | 3.05          |                       |                             | *                     |                          |
| Protein-coding        | AT2G38330.1           | 2.28                     | 2.47          |                       |                             | *                     |                          |
| Protein-coding        | AT2G38460.1           | 2.00                     | 1.78          |                       |                             |                       |                          |
| Protein-coding        | AT2G43700.1           | 2.33                     | 1.83          |                       |                             |                       |                          |
| Protein-coding        | AT2G44850.1           | 2.14                     | 2.30          |                       |                             | *                     |                          |
| Protein-coding        | AT2G45770.1           | 2.48                     | 1.15          |                       |                             |                       |                          |
| Protein-coding        | AT2G45920.1           | 2.07                     | 1.64          |                       |                             |                       |                          |
| Protein-coding        | AT2G47490.1           | 2.50                     | 3.30          |                       |                             | *                     |                          |
| Protein-coding        | AT2G48000.1           | 2.03                     | 1.89          |                       |                             | *                     |                          |
| Protein-coding        | AT3G02060.1           | 1.90                     | 1.54          |                       |                             |                       |                          |
| Protein-coding        | AT3G02370.1           | 2.72                     | 2.60          |                       |                             |                       |                          |
| Protein-coding        | AT3G03360.1           | 2.74                     | 3.30          |                       |                             | *                     |                          |
| Protein-coding        | AT3G06210.1           | 2.56                     | 2.56          |                       |                             | *                     |                          |
| Protein-coding        | AT3G08720.1           | 1.95                     | 1.82          |                       |                             |                       |                          |
| Protein-coding        | AT3G08730.1           | 3.00                     | 3.08          |                       |                             | *                     |                          |
| Protein-coding        | AT3G09550.1           | 1.88                     | 1.75          |                       |                             |                       |                          |
| Protein-coding        | AT3G18000.1           | 4.78                     | 5.90          |                       |                             | *                     |                          |
| Protein-coding        | AT3G18500.1           | 1.95                     | 2.33          |                       |                             | *                     |                          |
| Protein-coding        | AT3G20080.1           | 1.91                     | 2.71          |                       |                             | *                     |                          |
| Protein-coding        | AT3G20120.1           | 2.13                     | 2.02          |                       |                             | *                     |                          |
| Protein-coding        | AT3G20620.1           | 1.96                     | 1.77          |                       |                             |                       |                          |
| Protein-coding        | AT3G21390.1           | 3.29                     | 3.48          |                       |                             | *                     |                          |
| Protein-coding        | AT3G24070.1           | 2.76                     | 2.84          |                       |                             | *                     |                          |
| Protein-coding        | AT3G26080.1           | 3.34                     | 3.30          |                       |                             |                       |                          |
| Protein-coding        | AT3G26540.1           | 1.82                     | 2.09          |                       |                             | *                     |                          |

| Category <sup>†</sup> | AGI code <sup>‡</sup> | Fold change <sup>§</sup> |               | nat-RNA <sup>¶</sup> | Other mlncRNA <sup>  </sup> | Overlap <sup>††</sup> | Sense gene <sup>††</sup> |
|-----------------------|-----------------------|--------------------------|---------------|----------------------|-----------------------------|-----------------------|--------------------------|
|                       |                       | <i>Upf3-1</i>            | <i>upf1-1</i> |                      |                             |                       |                          |
| Protein-coding        | AT3G26950.1           | 1.85                     | 1.83          |                      |                             | *                     |                          |
| Protein-coding        | AT3G45443.1           | 3.48                     | 2.69          |                      |                             | *                     |                          |
| Protein-coding        | AT3G46370.1           | 2.02                     | 1.72          |                      |                             |                       |                          |
| Protein-coding        | AT3G53240.1           | 4.61                     | 5.18          |                      |                             | *                     |                          |
| Protein-coding        | AT3G53400.1           | 4.58                     | 5.24          |                      |                             | *                     |                          |
| Protein-coding        | AT3G56300.1           | 2.25                     | 3.08          |                      |                             | *                     |                          |
| Protein-coding        | AT3G56840.1           | 2.46                     | 2.02          |                      |                             | *                     |                          |
| Protein-coding        | AT3G58940.1           | 2.10                     | 1.91          |                      |                             | *                     |                          |
| Protein-coding        | AT3G60310.1           | 1.94                     | 2.06          |                      |                             | *                     |                          |
| Protein-coding        | AT4G00590.1           | 2.49                     | 2.71          |                      |                             | *                     |                          |
| Protein-coding        | AT4G03060.1           | 4.70                     | 2.95          |                      |                             | *                     |                          |
| Protein-coding        | AT4G03260.1           | 1.94                     | 2.49          |                      |                             | *                     |                          |
| Protein-coding        | AT4G07825.1           | 1.95                     | 1.95          |                      |                             | *                     |                          |
| Protein-coding        | AT4G11000.1           | 2.65                     | 2.18          |                      |                             | *                     |                          |
| Protein-coding        | AT4G13810.1           | 2.87                     | 2.67          |                      |                             | *                     |                          |
| Protein-coding        | AT4G15260.1           | 4.91                     | 3.27          |                      |                             | *                     |                          |
| Protein-coding        | AT4G15440.1           | 2.15                     | 2.20          |                      |                             | *                     |                          |
| Protein-coding        | AT4G18270.1           | 1.97                     | 2.41          |                      |                             | *                     |                          |
| Protein-coding        | AT4G19110.1           | 2.58                     | 3.22          |                      |                             | *                     |                          |
| Protein-coding        | AT4G19160.1           | 1.93                     | 1.66          |                      |                             |                       |                          |
| Protein-coding        | AT4G23050.1           | 1.85                     | 2.16          |                      |                             | *                     |                          |
| Protein-coding        | AT4G24810.1           | 2.37                     | 2.73          |                      |                             | *                     |                          |
| Protein-coding        | AT4G25270.1           | 2.89                     | 2.26          |                      |                             | *                     |                          |
| Protein-coding        | AT4G25290.1           | 2.08                     | 1.77          |                      |                             |                       |                          |
| Protein-coding        | AT4G25600.1           | 2.71                     | 2.62          |                      |                             | *                     |                          |
| Protein-coding        | AT4G26520.1           | 2.08                     | 2.12          |                      |                             | *                     |                          |
| Protein-coding        | AT4G26555.1           | 2.16                     | 1.94          |                      |                             | *                     |                          |
| Protein-coding        | AT4G26850.1           | 2.55                     | 3.38          |                      |                             | *                     |                          |
| Protein-coding        | AT4G27820.1           | 2.49                     | 2.07          |                      |                             |                       |                          |
| Protein-coding        | AT4G30680.1           | 2.76                     | 2.30          |                      |                             | *                     |                          |
| Protein-coding        | AT4G30960.1           | 1.92                     | 1.97          |                      |                             | *                     |                          |
| Protein-coding        | AT4G31870.1           | 2.89                     | 2.18          |                      |                             |                       |                          |
| Protein-coding        | AT4G32270.1           | 2.73                     | 2.88          |                      |                             | *                     |                          |
| Protein-coding        | AT4G33470.1           | 2.19                     | 2.22          |                      |                             | *                     |                          |
| Protein-coding        | AT4G34020.1           | 2.30                     | 2.17          |                      |                             | *                     |                          |
| Protein-coding        | AT4G36840.1           | 4.47                     | 4.50          |                      |                             | *                     |                          |
| Protein-coding        | AT5G01450.1           | 2.41                     | 2.60          |                      |                             | *                     |                          |
| Protein-coding        | AT5G01670.1           | 2.74                     | 2.02          |                      |                             |                       |                          |
| Protein-coding        | AT5G01810.1           | 2.19                     | 2.41          |                      |                             | *                     |                          |
| Protein-coding        | AT5G02650.1           | 4.29                     | 3.80          |                      |                             | *                     |                          |
| Protein-coding        | AT5G03406.1           | 2.85                     | 3.43          |                      |                             |                       |                          |
| Protein-coding        | AT5G04620.1           | 2.55                     | 2.31          |                      |                             |                       |                          |
| Protein-coding        | AT5G06770.1           | 2.66                     | 2.26          |                      |                             |                       |                          |
| Protein-coding        | AT5G08510.1           | 2.40                     | 1.99          |                      |                             | *                     |                          |
| Protein-coding        | AT5G09460.1           | 2.82                     | 3.26          |                      |                             | *                     |                          |
| Protein-coding        | AT5G09670.1           | 1.92                     | 1.83          |                      |                             |                       |                          |
| Protein-coding        | AT5G10140.1           | 3.67                     | 1.62          |                      |                             |                       |                          |
| Protein-coding        | AT5G10690.1           | 2.49                     | 2.16          |                      |                             |                       |                          |
| Protein-coding        | AT5G15410.1           | 1.87                     | 1.77          |                      |                             |                       |                          |
| Protein-coding        | AT5G15950.1           | 2.97                     | 6.78          |                      |                             | *                     |                          |
| Protein-coding        | AT5G16540.1           | 2.31                     | 2.47          |                      |                             | *                     |                          |
| Protein-coding        | AT5G17670.1           | 2.72                     | 2.06          |                      |                             | *                     |                          |
| Protein-coding        | AT5G19400.1           | 3.88                     | 2.52          |                      |                             | *                     |                          |
| Protein-coding        | AT5G20220.1           | 2.11                     | 2.55          |                      |                             | *                     |                          |
| Protein-coding        | AT5G23380.1           | 2.59                     | 1.77          |                      |                             |                       |                          |
| Protein-coding        | AT5G24090.1           | 3.06                     | 1.81          |                      |                             |                       |                          |
| Protein-coding        | AT5G36940.1           | 3.92                     | 3.73          |                      |                             | *                     |                          |
| Protein-coding        | AT5G37260.1           | 3.35                     | 3.21          |                      |                             | *                     |                          |
| Protein-coding        | AT5G38590.1           | 2.14                     | 1.90          |                      |                             | *                     |                          |
| Protein-coding        | AT5G41130.1           | 2.02                     | 1.77          |                      |                             |                       |                          |
| Protein-coding        | AT5G45430.1           | 6.32                     | 7.30          |                      |                             | *                     |                          |
| Protein-coding        | AT5G47790.1           | 2.29                     | 2.21          |                      |                             | *                     |                          |
| Protein-coding        | AT5G47880.1           | 2.58                     | 5.13          |                      |                             | *                     |                          |
| Protein-coding        | AT5G48440.1           | 2.11                     | 2.08          |                      |                             | *                     |                          |

| Category <sup>†</sup> | AGI code <sup>‡</sup> | Fold change <sup>§</sup> |               | nat-RNA <sup>¶</sup> | Other mlncRNA <sup>  </sup> | Overlap <sup>††</sup> | Sense gene <sup>††</sup>              |
|-----------------------|-----------------------|--------------------------|---------------|----------------------|-----------------------------|-----------------------|---------------------------------------|
|                       |                       | <i>Upf3-1</i>            | <i>upf1-1</i> |                      |                             |                       |                                       |
| Protein-coding        | AT5G52120.1           | 1.91                     | 1.41          |                      |                             |                       |                                       |
| Protein-coding        | AT5G52550.1           | 2.14                     | 1.92          |                      |                             | *                     |                                       |
| Protein-coding        | AT5G53900.1           | 2.20                     | 2.27          |                      |                             | *                     |                                       |
| Protein-coding        | AT5G54520.1           | 1.99                     | 1.60          |                      |                             |                       |                                       |
| Protein-coding        | AT5G55100.1           | 1.83                     | 1.60          |                      |                             |                       |                                       |
| Protein-coding        | AT5G56990.1           | 4.58                     | 2.86          |                      |                             | *                     |                                       |
| Protein-coding        | AT5G60700.1           | 2.00                     | 1.58          |                      |                             |                       |                                       |
| Protein-coding        | AT5G61930.1           | 2.40                     | 2.05          |                      |                             |                       |                                       |
| Protein-coding        | AT5G64340.1           | 2.71                     | 2.39          |                      |                             | *                     |                                       |
| Protein-coding        | AT5G65450.1           | 2.00                     | 2.40          |                      |                             | *                     |                                       |
| Protein-coding        | AT5G66005.1           | 3.04                     | 2.80          |                      |                             | *                     |                                       |
| mlncRNA               | AT1G01448.1           | 1.88                     | 1.87          | *                    |                             | *                     | AT1G01450                             |
| mlncRNA               | AT1G07728.1           | 2.58                     | 2.25          | *                    |                             | *                     | AT1G07725                             |
| mlncRNA               | AT1G11175.1           | 1.91                     | 1.75          |                      | **                          |                       |                                       |
| mlncRNA               | AT1G33415.1           | 3.14                     | 3.60          | *                    |                             | *                     | AT1G33420,<br>AT1G33430               |
| mlncRNA               | AT1G34844.1           | 3.20                     | 2.96          | *                    |                             | *                     | <b>AT1G34842</b>                      |
| mlncRNA               | AT1G48315.1           | 3.62                     | 3.22          | *                    |                             | *                     | AT1G48320                             |
| mlncRNA               | AT1G51645.1           | 1.91                     | 2.28          | *                    |                             | *                     | AT1G51640                             |
| mlncRNA               | AT1G56612.1           | 3.45                     | 1.92          | *                    |                             |                       | AT1G56610                             |
| mlncRNA               | AT1G60505.1           | 2.26                     | 2.16          | *                    |                             | *                     | <b>AT1G60510</b>                      |
| mlncRNA               | AT1G60545.1           | 1.98                     | 2.63          | *                    |                             | *                     | <b>AT1G60540</b>                      |
| mlncRNA               | AT1G67792.1           | 2.82                     | 3.25          | *                    |                             | *                     | AT1G67790                             |
| mlncRNA               | AT1G69252.1           | 4.04                     | 3.63          |                      | **                          | *                     |                                       |
| mlncRNA               | AT1G72855.1           | 3.40                     | 2.77          | *                    |                             | *                     | AT1G72860                             |
| mlncRNA               | AT1G80325.1           | 2.03                     | 1.78          | *                    |                             |                       | AT1G80320                             |
| mlncRNA               | AT2G24755.1           | 3.31                     | 2.66          | *                    |                             | *                     | <b>AT2G24750,</b><br><b>AT2G24760</b> |
| mlncRNA               | AT2G35945.1           | 2.78                     | 2.69          | *                    |                             |                       | AT2G35940                             |
| mlncRNA               | AT2G36792.1           | 2.51                     | 3.03          | *                    |                             | *                     | AT2G36790                             |
| mlncRNA               | AT3G26612.1           | 3.98                     | 4.27          |                      | **                          | *                     |                                       |
| mlncRNA               | AT3G27990.1           | 2.71                     | 3.41          |                      | **                          | *                     |                                       |
| mlncRNA               | AT3G56408.1           | 3.72                     | 3.26          | *                    |                             | *                     | AT3G56410                             |
| mlncRNA               | AT3G63445.1           | 3.55                     | 3.04          | *                    |                             | *                     | AT3G63440                             |
| mlncRNA               | AT4G37432.1           | 4.60                     | 4.11          | *                    |                             | *                     | AT4G37430                             |
| mlncRNA               | AT5G43403.1           | 3.03                     | 2.38          |                      | **                          |                       |                                       |
| mlncRNA               | AT5G53048.1           | 2.71                     | 4.60          | *                    |                             | *                     | AT5G53050                             |
| mlncRNA               | AT5G54569.1           | 3.65                     | 3.01          | *                    |                             | *                     | AT5G54570                             |
| transposon            | AT2G13970.1           | 3.29                     | 3.92          |                      |                             | *                     |                                       |
| transposon            | AT2G13975.1           | 3.28                     | 2.19          |                      |                             |                       |                                       |
| transposon            | AT4G04293.1           | 3.97                     | 3.25          |                      |                             | *                     |                                       |
| transposon            | AT5G28626.1           | 2.61                     | 3.28          |                      |                             | *                     |                                       |

<sup>†</sup>We classified the up-regulated AGI-annotated genes into 4 categories, protein-coding, mlncRNA, transposon, and other.

<sup>‡</sup>AGI-annotated genes. The genes marked by bold characters indicate exosome substrates reported previously (Chekanova JA, et al. (2007) Genome-wide high resolution mapping of exosome substrates reveals hidden feature in the *Arabidopsis* transcriptome. *Cell* 131:1340–1353).

<sup>§</sup>{Signal Intensity (HLE values) of each gene in *upf1-1* or *upf3-1*} ÷ {Signal Intensity (HLE values) of each gene in wild type}.

<sup>¶</sup>Genes for nat-RNAs are marked by asterisks.

<sup>||</sup>Genes for other mlncRNA are marked by double asterisks.

<sup>††</sup>Genes up-regulated in both *upf1-1* and *upf3-1* are marked by asterisks.

<sup>†††</sup>These represent the sense genes overlapping >1 base with nat-RNAs. The genes marked by bold characters encode transposons or pseudogenes.

Table S3. AGI mlncRNAs expressed in wild type or *upf1-1*

| Category <sup>†</sup>    | AGI code    | Fold change <sup>‡</sup> |               | Sense gene <sup>§</sup> |
|--------------------------|-------------|--------------------------|---------------|-------------------------|
|                          |             | <i>upf1-1</i>            | <i>upf3-1</i> |                         |
| F <sub>≧</sub> 1.8       | AT1G01448.1 | 1.87                     | 1.88          | AT1G01450               |
| F <sub>≧</sub> 1.8       | AT1G04295.1 | 1.81                     | 1.70          | AT1G04290               |
| F <sub>≧</sub> 1.8       | AT1G07119.1 | 2.00                     | 2.19          | AT1G07120               |
| F <sub>≧</sub> 1.8       | AT1G07728.1 | 2.25                     | 2.58          | AT1G07725               |
| F <sub>≧</sub> 1.8       | AT1G11592.1 | 2.52                     | 2.11          |                         |
| F <sub>≧</sub> 1.8       | AT1G17255.1 | 1.80                     | 1.30          | AT1G17250               |
| F <sub>≧</sub> 1.8       | AT1G22403.1 | 2.30                     | 3.56          |                         |
| F <sub>≧</sub> 1.8       | AT1G24148.1 | 2.82                     | 2.86          |                         |
| F <sub>≧</sub> 1.8       | AT1G33415.1 | 3.60                     | 3.14          | AT1G33420,<br>AT1G33430 |
| F <sub>≧</sub> 1.8       | AT1G34844.1 | 2.96                     | 3.20          | AT1G34842               |
| F <sub>≧</sub> 1.8       | AT1G48315.1 | 3.22                     | 3.62          | AT1G48320               |
| F <sub>≧</sub> 1.8       | AT1G51645.1 | 2.28                     | 1.91          | AT1G5164                |
| F <sub>≧</sub> 1.8       | AT1G56612.1 | 1.92                     | 3.45          | AT1G56610               |
| F <sub>≧</sub> 1.8       | AT1G60505.1 | 2.16                     | 2.26          | AT1G60510               |
| F <sub>≧</sub> 1.8       | AT1G60525.1 | 3.17                     | 2.80          | AT1G60530               |
| F <sub>≧</sub> 1.8       | AT1G60545.1 | 2.63                     | 1.98          | AT1G60540               |
| F <sub>≧</sub> 1.8       | AT1G67792.1 | 3.25                     | 2.82          | AT1G67790               |
| F <sub>≧</sub> 1.8       | AT1G69252.1 | 3.63                     | 4.04          |                         |
| F <sub>≧</sub> 1.8       | AT1G72855.1 | 2.77                     | 3.40          | AT1G72860               |
| F <sub>≧</sub> 1.8       | AT1G78265.1 | 1.91                     | 2.04          | AT1G78270               |
| F <sub>≧</sub> 1.8       | AT2G06002.1 | 5.93                     | 2.03          |                         |
| F <sub>≧</sub> 1.8       | AT2G13665.1 | 1.90                     | 1.39          | AT2G13660               |
| F <sub>≧</sub> 1.8       | AT2G15128.1 | 1.98                     | 1.52          |                         |
| F <sub>≧</sub> 1.8       | AT2G24755.1 | 2.66                     | 3.31          | AT2G24750,<br>AT2G24760 |
| F <sub>≧</sub> 1.8       | AT2G32795.1 | 4.65                     | 4.23          |                         |
| F <sub>≧</sub> 1.8       | AT2G35738.1 | 2.14                     | 2.30          | AT2G35740               |
| F <sub>≧</sub> 1.8       | AT2G35945.1 | 2.69                     | 2.78          | AT2G35940               |
| F <sub>≧</sub> 1.8       | AT2G36792.1 | 3.03                     | 2.51          | AT2G36790               |
| F <sub>≧</sub> 1.8       | AT2G42247.1 | 2.08                     | 1.48          | AT2G42250               |
| F <sub>≧</sub> 1.8       | AT2G42485.1 | 1.91                     | 1.54          |                         |
| F <sub>≧</sub> 1.8       | AT2G44798.1 | 1.85                     | 1.64          | AT2G44800               |
| F <sub>≧</sub> 1.8       | AT2G45023.1 | 1.95                     | 1.90          |                         |
| F <sub>≧</sub> 1.8       | AT3G01142.1 | 2.33                     | 1.48          | AT3G01140               |
| F <sub>≧</sub> 1.8       | AT3G04485.1 | 3.09                     | 2.34          |                         |
| F <sub>≧</sub> 1.8       | AT3G24518.1 | 2.66                     | 1.99          | AT3G24520               |
| F <sub>≧</sub> 1.8       | AT3G26612.1 | 4.27                     | 3.98          |                         |
| F <sub>≧</sub> 1.8       | AT3G27990.1 | 3.41                     | 2.71          |                         |
| F <sub>≧</sub> 1.8       | AT3G45638.1 | 2.20                     | 1.49          |                         |
| F <sub>≧</sub> 1.8       | AT3G46658.1 | 2.23                     | 1.67          | AT3G46660               |
| F <sub>≧</sub> 1.8       | AT3G48115.1 | 2.03                     | 2.01          |                         |
| F <sub>≧</sub> 1.8       | AT3G56408.1 | 3.26                     | 3.72          | AT3G56410               |
| F <sub>≧</sub> 1.8       | AT3G57157.1 | 3.44                     | 2.48          |                         |
| F <sub>≧</sub> 1.8       | AT3G59778.1 | 1.81                     | 1.53          |                         |
| F <sub>≧</sub> 1.8       | AT3G63445.1 | 3.04                     | 3.55          | AT3G63440               |
| F <sub>≧</sub> 1.8       | AT4G03935.1 | 1.85                     | 1.92          |                         |
| F <sub>≧</sub> 1.8       | AT4G04221.1 | 1.99                     | 1.43          | AT4G04220               |
| F <sub>≧</sub> 1.8       | AT4G06701.1 | 3.04                     | 2.87          |                         |
| F <sub>≧</sub> 1.8       | AT4G13495.1 | 2.09                     | 2.16          |                         |
| F <sub>≧</sub> 1.8       | AT4G26795.1 | 2.17                     | 1.57          | AT4G26790               |
| F <sub>≧</sub> 1.8       | AT4G37432.1 | 4.11                     | 4.60          | AT4G37430               |
| F <sub>≧</sub> 1.8       | AT5G03285.1 | 1.92                     | 1.47          |                         |
| F <sub>≧</sub> 1.8       | AT5G09443.1 | 2.07                     | 2.32          | AT5G09445               |
| F <sub>≧</sub> 1.8       | AT5G24735.1 | 1.98                     | 2.38          |                         |
| F <sub>≧</sub> 1.8       | AT5G36002.1 | 1.86                     | 2.11          | AT5G36001,<br>AT5G36000 |
| F <sub>≧</sub> 1.8       | AT5G43403.1 | 2.38                     | 3.03          |                         |
| F <sub>≧</sub> 1.8       | AT5G53048.1 | 4.60                     | 2.71          | AT5G53050               |
| F <sub>≧</sub> 1.8       | AT5G54569.1 | 3.01                     | 3.65          | AT5G54570               |
| 1.5 <sub>≦</sub> F < 1.8 | AT1G11175.1 | 1.75                     | 1.91          |                         |
| 1.5 <sub>≦</sub> F < 1.8 | AT1G46554.1 | 1.55                     | 1.60          |                         |
| 1.5 <sub>≦</sub> F < 1.8 | AT1G67105.1 | 1.66                     | 2.12          |                         |

| Category <sup>†</sup> | AGI code    | Fold change <sup>‡</sup> |               | Sense gene <sup>§</sup> |
|-----------------------|-------------|--------------------------|---------------|-------------------------|
|                       |             | <i>upf1-1</i>            | <i>upf3-1</i> |                         |
| 1.5≤F < 1.8           | AT1G67328.1 | 1.56                     | 1.53          | AT1G67330               |
| 1.5≤F < 1.8           | AT1G69587.1 | 1.74                     | 2.20          |                         |
| 1.5≤F < 1.8           | AT1G77138.1 | 1.75                     | 1.38          |                         |
| 1.5≤F < 1.8           | AT1G80325.1 | 1.78                     | 2.03          | AT1G80320               |
| 1.5≤F < 1.8           | AT2G09795.1 | 1.64                     | 1.68          | AT2G09800               |
| 1.5≤F < 1.8           | AT2G33051.1 | 1.59                     | 1.12          | AT2G33050               |
| 1.5≤F < 1.8           | AT2G42365.1 | 1.70                     | 1.42          | AT2G42360,<br>AT2G42370 |
| 1.5≤F < 1.8           | AT3G52072.1 | 1.68                     | 1.99          | AT3G52070               |
| 1.5≤F < 1.8           | AT3G52535.1 | 1.58                     | 1.67          | AT3G52540               |
| 1.5≤F < 1.8           | AT4G14548.1 | 1.53                     | 1.21          |                         |
| 1.5≤F < 1.8           | AT5G01175.1 | 1.76                     | 1.28          | AT5G01180               |
| 1.5≤F < 1.8           | AT5G01595.1 | 1.73                     | 1.33          | AT5G01600               |
| 1.5≤F < 1.8           | AT5G18255.1 | 1.71                     | 1.56          | AT5G18260               |
| 1.5≤F < 1.8           | AT5G43725.1 | 1.51                     | 1.26          |                         |
| 1.2≤F < 1.5           | AT1G10682.1 | 1.24                     | 1.06          |                         |
| 1.2≤F < 1.5           | AT1G18415.1 | 1.46                     | 1.23          | AT1G18420               |
| 1.2≤F < 1.5           | AT1G26208.1 | 1.35                     | 1.48          | AT1G26210               |
| 1.2≤F < 1.5           | AT1G67365.1 | 1.44                     | 1.18          | AT1G67370               |
| 1.2≤F < 1.5           | AT1G75295.1 | 1.41                     | 1.38          | AT1G75290,<br>AT1G75300 |
| 1.2≤F < 1.5           | AT1G76878.1 | 1.25                     | 1.48          | AT1G76880               |
| 1.2≤F < 1.5           | AT2G14115.1 | 1.31                     | 1.07          | AT2G14120               |
| 1.2≤F < 1.5           | AT2G21187.1 | 1.36                     | 0.89          | AT2G21185               |
| 1.2≤F < 1.5           | AT2G21188.1 | 1.30                     | 1.31          |                         |
| 1.2≤F < 1.5           | AT2G22821.1 | 1.42                     | 0.98          | AT2G22820               |
| 1.2≤F < 1.5           | AT2G23672.1 | 1.35                     | 1.25          | AT2G23670               |
| 1.2≤F < 1.5           | AT2G26355.1 | 1.30                     | 1.57          | AT2G26360               |
| 1.2≤F < 1.5           | AT2G30362.1 | 1.35                     | 0.85          | AT2G30360               |
| 1.2≤F < 1.5           | AT2G31585.1 | 1.27                     | 1.30          |                         |
| 1.2≤F < 1.5           | AT2G44255.1 | 1.25                     | 1.56          | AT2G44260               |
| 1.2≤F < 1.5           | AT2G46192.1 | 1.31                     | 1.05          |                         |
| 1.2≤F < 1.5           | AT3G21755.1 | 1.43                     | 1.58          | AT3G21760               |
| 1.2≤F < 1.5           | AT3G22121.1 | 1.25                     | 1.30          | AT3G22120               |
| 1.2≤F < 1.5           | AT3G51075.1 | 1.42                     | 1.16          | AT3G51070               |
| 1.2≤F < 1.5           | AT3G51238.1 | 1.25                     | 0.96          | AT3G51240               |
| 1.2≤F < 1.5           | AT3G62895.1 | 1.22                     | 1.08          |                         |
| 1.2≤F < 1.5           | AT4G08035.1 | 1.32                     | 1.16          |                         |
| 1.2≤F < 1.5           | AT4G12917.1 | 1.47                     | 1.28          |                         |
| 1.2≤F < 1.5           | AT4G26095.1 | 1.35                     | 1.55          | AT4G26090               |
| 1.2≤F < 1.5           | AT4G31248.1 | 1.32                     | 1.25          | AT4G31250               |
| 1.2≤F < 1.5           | AT5G05435.1 | 1.26                     | 1.24          | AT5G05430               |
| 1.2≤F < 1.5           | AT5G06865.1 | 1.30                     | 1.38          | AT5G06860               |
| 1.2≤F < 1.5           | AT5G18245.1 | 1.20                     | 0.93          | AT5G18240               |
| 1.2≤F < 1.5           | AT5G41612.1 | 1.35                     | 0.96          | AT5G41610               |
| 1.2≤F < 1.5           | AT5G48775.1 | 1.20                     | 1.46          | AT5G48770               |
| 1.2≤F < 1.5           | AT5G59732.1 | 1.38                     | 1.31          | AT5G59730               |
| 1.2≤F < 1.5           | AT5G64572.1 | 1.46                     | 1.43          | AT5G64570               |
| 1.2≤F < 1.5           | AT5G66558.1 | 1.22                     | 1.19          | AT5G66560               |
| 0.9≤F < 1.2           | AT1G11185.1 | 1.00                     | 0.86          |                         |
| 0.9≤F < 1.2           | AT1G13448.1 | 1.08                     | 1.20          | AT1G13450               |
| 0.9≤F < 1.2           | AT1G16489.1 | 0.98                     | 1.23          | AT1G16490               |
| 0.9≤F < 1.2           | AT1G29357.1 | 1.18                     | 1.32          | AT1G29355               |
| 0.9≤F < 1.2           | AT1G31935.1 | 0.91                     | 0.86          |                         |
| 0.9≤F < 1.2           | AT1G34418.1 | 1.15                     | 0.95          |                         |
| 0.9≤F < 1.2           | AT1G58590.1 | 1.02                     | 1.08          |                         |
| 0.9≤F < 1.2           | AT1G74088.1 | 1.09                     | 1.07          |                         |
| 0.9≤F < 1.2           | AT2G07042.1 | 1.12                     | 2.62          |                         |
| 0.9≤F < 1.2           | AT2G13431.1 | 1.00                     | 0.50          | AT2G13430               |
| 0.9≤F < 1.2           | AT2G15555.1 | 1.20                     | 1.29          |                         |
| 0.9≤F < 1.2           | AT2G18440.1 | 1.12                     | 1.08          |                         |
| 0.9≤F < 1.2           | AT2G18735.1 | 1.11                     | 0.97          |                         |
| 0.9≤F < 1.2           | AT2G41312.1 | 0.92                     | 0.96          |                         |
| 0.9≤F < 1.2           | AT2G43375.1 | 1.03                     | 1.01          |                         |

| Category <sup>†</sup> | AGI code    | Fold change <sup>‡</sup> |               | Sense gene <sup>§</sup> |
|-----------------------|-------------|--------------------------|---------------|-------------------------|
|                       |             | <i>upf1-1</i>            | <i>upf3-1</i> |                         |
| 0.9 ≦ F < 1.2         | AT2G45315.1 | 1.16                     | 1.01          | AT2G45310               |
| 0.9 ≦ F < 1.2         | AT3G01202.1 | 0.97                     | 0.87          | AT3G01200               |
| 0.9 ≦ F < 1.2         | AT3G06125.1 | 1.20                     | 1.31          |                         |
| 0.9 ≦ F < 1.2         | AT3G12965.1 | 0.98                     | 0.83          |                         |
| 0.9 ≦ F < 1.2         | AT3G13061.1 | 1.14                     | 1.06          | AT3G13060               |
| 0.9 ≦ F < 1.2         | AT3G13277.1 | 1.09                     | 0.96          |                         |
| 0.9 ≦ F < 1.2         | AT3G14172.1 | 0.93                     | 0.87          |                         |
| 0.9 ≦ F < 1.2         | AT3G18535.1 | 0.98                     | 1.28          | AT3G18540               |
| 0.9 ≦ F < 1.2         | AT3G52605.1 | 0.98                     | 1.17          | AT3G52610               |
| 0.9 ≦ F < 1.2         | AT4G01593.1 | 1.01                     | 0.98          | AT4G01595               |
| 0.9 ≦ F < 1.2         | AT4G13505.1 | 0.98                     | 1.22          | AT4G13510               |
| 0.9 ≦ F < 1.2         | AT4G15242.1 | 0.96                     | 0.86          |                         |
| 0.9 ≦ F < 1.2         | AT4G17098.1 | 1.04                     | 0.97          | AT4G17100               |
| 0.9 ≦ F < 1.2         | AT4G38545.1 | 1.10                     | 1.41          | AT4G38530,<br>AT4G38540 |
| 0.9 ≦ F < 1.2         | AT4G40065.1 | 1.00                     | 1.08          |                         |
| 0.9 ≦ F < 1.2         | AT5G15845.1 | 0.99                     | 1.24          | AT5G15850               |
| 0.9 ≦ F < 1.2         | AT5G19221.1 | 1.12                     | 0.92          | AT5G19220               |
| 0.9 ≦ F < 1.2         | AT5G28262.1 | 0.95                     | 0.79          |                         |
| 0.9 ≦ F < 1.2         | AT5G63195.1 | 1.09                     | 1.07          | AT5G63190               |
| 0.9 ≦ F < 1.2         | AT5G67488.1 | 1.16                     | 0.72          | AT5G67490               |
| 0.6 ≦ F < 0.9         | AT1G15175.1 | 0.86                     | 1.17          | AT1G15170               |
| 0.6 ≦ F < 0.9         | AT1G26218.1 | 0.77                     | 0.77          | AT1G26220               |
| 0.6 ≦ F < 0.9         | AT1G29785.1 | 0.87                     | 0.99          | AT1G29780               |
| 0.6 ≦ F < 0.9         | AT1G69572.1 | 0.71                     | 0.87          | AT1G69570               |
| 0.6 ≦ F < 0.9         | AT1G76892.1 | 0.80                     | 1.02          | AT1G76890               |
| 0.6 ≦ F < 0.9         | AT3G05905.1 | 0.66                     | 0.71          | AT3G05900               |
| 0.6 ≦ F < 0.9         | AT3G07215.1 | 0.87                     | 0.82          |                         |
| 0.6 ≦ F < 0.9         | AT4G20362.1 | 0.67                     | 0.59          | AT4G20360               |
| 0.6 ≦ F < 0.9         | AT4G26488.1 | 0.75                     | 0.67          | AT4G26490               |
| 0.6 ≦ F < 0.9         | AT4G36648.1 | 0.77                     | 0.76          |                         |
| 0.6 ≦ F < 0.9         | AT5G07322.1 | 0.67                     | 0.77          |                         |

<sup>†</sup>We classified the AGI miRNAs into 6 groups based on the fold (F) changes.

<sup>‡</sup>{Signal Intensity (HLE values) of each gene in *upf1-1* or *upf3-1*} ÷ {Signal Intensity (HLE values) of each gene in wild type}.

<sup>§</sup>These represent the sense genes overlapping more than one base with nat-RNAs.

Table S4. AGI mlncRNAs expressed in wild type or *upf3-1*

| Category <sup>†</sup>    | AGI code    | Fold change <sup>‡</sup> |               | Sense gene <sup>§</sup> |
|--------------------------|-------------|--------------------------|---------------|-------------------------|
|                          |             | <i>upf3-1</i>            | <i>upf1-1</i> |                         |
| F <sub>≧</sub> 1.8       | AT1G01448.1 | 1.87                     | 1.88          | AT1G01450               |
| F <sub>≧</sub> 1.8       | AT1G07728.1 | 2.25                     | 2.58          | AT1G07725               |
| F <sub>≧</sub> 1.8       | AT1G11175.1 | 1.75                     | 1.91          |                         |
| F <sub>≧</sub> 1.8       | AT1G11592.1 | 2.52                     | 2.11          |                         |
| F <sub>≧</sub> 1.8       | AT1G22403.1 | 2.30                     | 3.56          |                         |
| F <sub>≧</sub> 1.8       | AT1G24148.1 | 2.82                     | 2.86          |                         |
| F <sub>≧</sub> 1.8       | AT1G33415.1 | 3.60                     | 3.14          | AT1G33420,<br>AT1G33430 |
| F <sub>≧</sub> 1.8       | AT1G34844.1 | 2.96                     | 3.20          | AT1G34842               |
| F <sub>≧</sub> 1.8       | AT1G48315.1 | 3.22                     | 3.62          | AT1G48320               |
| F <sub>≧</sub> 1.8       | AT1G51645.1 | 2.28                     | 1.91          | AT1G51640               |
| F <sub>≧</sub> 1.8       | AT1G56612.1 | 1.92                     | 3.45          | AT1G56610               |
| F <sub>≧</sub> 1.8       | AT1G60505.1 | 2.16                     | 2.26          | AT1G60510               |
| F <sub>≧</sub> 1.8       | AT1G60525.1 | 3.17                     | 2.80          | AT1G60530               |
| F <sub>≧</sub> 1.8       | AT1G60545.1 | 2.63                     | 1.98          | AT1G60540               |
| F <sub>≧</sub> 1.8       | AT1G67105.1 | 1.66                     | 2.12          |                         |
| F <sub>≧</sub> 1.8       | AT1G67792.1 | 3.25                     | 2.82          | AT1G67790               |
| F <sub>≧</sub> 1.8       | AT1G69252.1 | 3.63                     | 4.04          |                         |
| F <sub>≧</sub> 1.8       | AT1G69587.1 | 1.74                     | 2.20          |                         |
| F <sub>≧</sub> 1.8       | AT1G72855.1 | 2.77                     | 3.40          | AT1G72860               |
| F <sub>≧</sub> 1.8       | AT1G78265.1 | 1.91                     | 2.04          | AT1G78270               |
| F <sub>≧</sub> 1.8       | AT1G80325.1 | 1.78                     | 2.03          | AT1G80320               |
| F <sub>≧</sub> 1.8       | AT2G06002.1 | 5.93                     | 2.03          |                         |
| F <sub>≧</sub> 1.8       | AT2G07042.1 | 1.12                     | 2.62          |                         |
| F <sub>≧</sub> 1.8       | AT2G24755.1 | 2.66                     | 3.31          | AT2G24750,<br>AT2G24760 |
| F <sub>≧</sub> 1.8       | AT2G32795.1 | 4.65                     | 4.23          |                         |
| F <sub>≧</sub> 1.8       | AT2G35738.1 | 2.14                     | 2.30          | AT2G35740               |
| F <sub>≧</sub> 1.8       | AT2G35945.1 | 2.69                     | 2.78          | AT2G35940               |
| F <sub>≧</sub> 1.8       | AT2G36792.1 | 3.03                     | 2.51          | AT2G36790               |
| F <sub>≧</sub> 1.8       | AT3G04485.1 | 3.09                     | 2.34          |                         |
| F <sub>≧</sub> 1.8       | AT3G24518.1 | 2.66                     | 1.99          | AT3G24520               |
| F <sub>≧</sub> 1.8       | AT3G26612.1 | 4.27                     | 3.98          |                         |
| F <sub>≧</sub> 1.8       | AT3G27990.1 | 3.41                     | 2.71          |                         |
| F <sub>≧</sub> 1.8       | AT3G46668.1 | 2.49                     | 1.86          |                         |
| F <sub>≧</sub> 1.8       | AT3G48115.1 | 2.03                     | 2.01          |                         |
| F <sub>≧</sub> 1.8       | AT3G52072.1 | 1.68                     | 1.99          | AT3G52070               |
| F <sub>≧</sub> 1.8       | AT3G56408.1 | 3.26                     | 3.72          | AT3G56410               |
| F <sub>≧</sub> 1.8       | AT3G57157.1 | 3.44                     | 2.48          |                         |
| F <sub>≧</sub> 1.8       | AT3G63445.1 | 3.04                     | 3.55          | AT3G63440               |
| F <sub>≧</sub> 1.8       | AT4G03935.1 | 1.85                     | 1.92          |                         |
| F <sub>≧</sub> 1.8       | AT4G06701.1 | 3.04                     | 2.87          |                         |
| F <sub>≧</sub> 1.8       | AT4G13495.1 | 2.09                     | 2.16          |                         |
| F <sub>≧</sub> 1.8       | AT4G37432.1 | 4.11                     | 4.60          | AT4G37430               |
| F <sub>≧</sub> 1.8       | AT4G38215.1 | 1.77                     | 2.08          | AT4G38210               |
| F <sub>≧</sub> 1.8       | AT5G09443.1 | 2.07                     | 2.32          | AT5G09445               |
| F <sub>≧</sub> 1.8       | AT5G24735.1 | 1.98                     | 2.38          |                         |
| F <sub>≧</sub> 1.8       | AT5G36002.1 | 1.86                     | 2.11          | AT5G36001,<br>AT5G36000 |
| F <sub>≧</sub> 1.8       | AT5G43403.1 | 2.38                     | 3.03          |                         |
| F <sub>≧</sub> 1.8       | AT5G53048.1 | 4.60                     | 2.71          | AT5G53050               |
| F <sub>≧</sub> 1.8       | AT5G54569.1 | 3.01                     | 3.65          | AT5G54570               |
| 1.5 <sub>≧</sub> F < 1.8 | AT1G04295.1 | 1.81                     | 1.70          | AT1G04290               |
| 1.5 <sub>≧</sub> F < 1.8 | AT1G46554.1 | 1.55                     | 1.60          |                         |
| 1.5 <sub>≧</sub> F < 1.8 | AT1G52347.1 | 1.83                     | 1.77          |                         |
| 1.5 <sub>≧</sub> F < 1.8 | AT1G67328.1 | 1.56                     | 1.53          | AT1G67330               |
| 1.5 <sub>≧</sub> F < 1.8 | AT2G09795.1 | 1.64                     | 1.68          | AT2G09800               |
| 1.5 <sub>≧</sub> F < 1.8 | AT2G15128.1 | 1.98                     | 1.52          |                         |
| 1.5 <sub>≧</sub> F < 1.8 | AT2G26355.1 | 1.30                     | 1.57          | AT2G26360               |
| 1.5 <sub>≧</sub> F < 1.8 | AT2G42485.1 | 1.91                     | 1.54          |                         |
| 1.5 <sub>≧</sub> F < 1.8 | AT2G44255.1 | 1.25                     | 1.56          | AT2G44260               |
| 1.5 <sub>≧</sub> F < 1.8 | AT2G44798.1 | 1.85                     | 1.64          | AT2G44800               |
| 1.5 <sub>≧</sub> F < 1.8 | AT3G21755.1 | 1.43                     | 1.58          | AT3G21760               |

| Category <sup>†</sup> | AGI code    | Fold change <sup>‡</sup> |               | Sense gene <sup>§</sup>              |
|-----------------------|-------------|--------------------------|---------------|--------------------------------------|
|                       |             | <i>upf3-1</i>            | <i>upf1-1</i> |                                      |
| 1.5 $\leq$ F < 1.8    | AT3G46658.1 | 2.23                     | 1.67          | AT3G46660                            |
| 1.5 $\leq$ F < 1.8    | AT3G52535.1 | 1.58                     | 1.67          | AT3G52540                            |
| 1.5 $\leq$ F < 1.8    | AT3G59778.1 | 1.81                     | 1.53          |                                      |
| 1.5 $\leq$ F < 1.8    | AT4G26095.1 | 1.35                     | 1.55          | AT4G26090                            |
| 1.5 $\leq$ F < 1.8    | AT4G26795.1 | 2.17                     | 1.57          | AT4G26790                            |
| 1.5 $\leq$ F < 1.8    | AT4G37225.1 | 1.62                     | 1.55          | AT4G37230                            |
| 1.5 $\leq$ F < 1.8    | AT5G18255.1 | 1.71                     | 1.56          | AT5G18260                            |
| 1.5 $\leq$ F < 1.8    | AT5G65575.1 | 1.69                     | 1.75          | AT5G65580                            |
| 1.2 $\leq$ F < 1.5    | AT1G13448.1 | 1.08                     | 1.20          | AT1G13450                            |
| 1.2 $\leq$ F < 1.5    | AT1G16489.1 | 0.98                     | 1.23          | AT1G16490                            |
| 1.2 $\leq$ F < 1.5    | AT1G18415.1 | 1.46                     | 1.23          | AT1G18420                            |
| 1.2 $\leq$ F < 1.5    | AT1G26208.1 | 1.35                     | 1.48          | AT1G26210                            |
| 1.2 $\leq$ F < 1.5    | AT1G29357.1 | 1.18                     | 1.32          | AT1G29355                            |
| 1.2 $\leq$ F < 1.5    | AT1G75295.1 | 1.41                     | 1.38          | AT1G75290,<br>AT1G75300<br>AT1G76880 |
| 1.2 $\leq$ F < 1.5    | AT1G76878.1 | 1.25                     | 1.48          |                                      |
| 1.2 $\leq$ F < 1.5    | AT1G77138.1 | 1.75                     | 1.38          |                                      |
| 1.2 $\leq$ F < 1.5    | AT2G13665.1 | 1.90                     | 1.39          | AT2G13660                            |
| 1.2 $\leq$ F < 1.5    | AT2G15555.1 | 1.20                     | 1.29          |                                      |
| 1.2 $\leq$ F < 1.5    | AT2G21188.1 | 1.30                     | 1.31          |                                      |
| 1.2 $\leq$ F < 1.5    | AT2G23672.1 | 1.35                     | 1.25          | AT2G23670                            |
| 1.2 $\leq$ F < 1.5    | AT2G24545.1 | 1.14                     | 1.26          | AT2G24540                            |
| 1.2 $\leq$ F < 1.5    | AT2G31585.1 | 1.27                     | 1.30          |                                      |
| 1.2 $\leq$ F < 1.5    | AT2G33815.1 | 1.02                     | 1.36          | AT2G33810                            |
| 1.2 $\leq$ F < 1.5    | AT2G42247.1 | 2.08                     | 1.48          | AT2G42250                            |
| 1.2 $\leq$ F < 1.5    | AT2G42365.1 | 1.70                     | 1.42          | AT2G42360,<br>AT2G42370<br>AT3G01140 |
| 1.2 $\leq$ F < 1.5    | AT3G01142.1 | 2.33                     | 1.48          |                                      |
| 1.2 $\leq$ F < 1.5    | AT3G06125.1 | 1.20                     | 1.31          |                                      |
| 1.2 $\leq$ F < 1.5    | AT3G18535.1 | 0.98                     | 1.28          | AT3G18540                            |
| 1.2 $\leq$ F < 1.5    | AT3G22121.1 | 1.25                     | 1.30          | AT3G22120                            |
| 1.2 $\leq$ F < 1.5    | AT3G29644.1 | 1.05                     | 1.23          | AT3G29642                            |
| 1.2 $\leq$ F < 1.5    | AT4G04221.1 | 1.99                     | 1.43          | AT4G04220                            |
| 1.2 $\leq$ F < 1.5    | AT4G12917.1 | 1.47                     | 1.28          |                                      |
| 1.2 $\leq$ F < 1.5    | AT4G13505.1 | 0.98                     | 1.22          | AT4G13510                            |
| 1.2 $\leq$ F < 1.5    | AT4G14548.1 | 1.53                     | 1.21          |                                      |
| 1.2 $\leq$ F < 1.5    | AT4G25719.1 | 1.20                     | 1.39          | AT4G25720                            |
| 1.2 $\leq$ F < 1.5    | AT4G31248.1 | 1.32                     | 1.25          | AT4G31250                            |
| 1.2 $\leq$ F < 1.5    | AT4G38545.1 | 1.10                     | 1.41          | AT4G38530,<br>AT4G38540              |
| 1.2 $\leq$ F < 1.5    | AT5G01175.1 | 1.76                     | 1.28          | AT5G01180                            |
| 1.2 $\leq$ F < 1.5    | AT5G01595.1 | 1.73                     | 1.33          | AT5G01600                            |
| 1.2 $\leq$ F < 1.5    | AT5G03285.1 | 1.92                     | 1.47          |                                      |
| 1.2 $\leq$ F < 1.5    | AT5G05435.1 | 1.26                     | 1.24          | AT5G05430                            |
| 1.2 $\leq$ F < 1.5    | AT5G06865.1 | 1.30                     | 1.38          | AT5G06860                            |
| 1.2 $\leq$ F < 1.5    | AT5G15845.1 | 0.99                     | 1.24          | AT5G15850                            |
| 1.2 $\leq$ F < 1.5    | AT5G43725.1 | 1.51                     | 1.26          |                                      |
| 1.2 $\leq$ F < 1.5    | AT5G48775.1 | 1.20                     | 1.46          | AT5G48770                            |
| 1.2 $\leq$ F < 1.5    | AT5G59732.1 | 1.38                     | 1.31          | AT5G59730                            |
| 1.2 $\leq$ F < 1.5    | AT5G64572.1 | 1.46                     | 1.43          | AT5G64570                            |
| 0.9 $\leq$ F < 1.2    | AT1G10682.1 | 1.24                     | 1.06          |                                      |
| 0.9 $\leq$ F < 1.2    | AT1G15175.1 | 0.86                     | 1.17          | AT1G15170                            |
| 0.9 $\leq$ F < 1.2    | AT1G29785.1 | 0.87                     | 0.99          | AT1G29780                            |
| 0.9 $\leq$ F < 1.2    | AT1G34418.1 | 1.15                     | 0.95          |                                      |
| 0.9 $\leq$ F < 1.2    | AT1G53801.1 | 0.98                     | 1.17          | AT1G53800                            |
| 0.9 $\leq$ F < 1.2    | AT1G58590.1 | 1.02                     | 1.08          |                                      |
| 0.9 $\leq$ F < 1.2    | AT1G67365.1 | 1.44                     | 1.18          | AT1G67370                            |
| 0.9 $\leq$ F < 1.2    | AT1G71528.1 | 1.21                     | 1.04          | AT1G71530                            |
| 0.9 $\leq$ F < 1.2    | AT1G74088.1 | 1.09                     | 1.07          |                                      |
| 0.9 $\leq$ F < 1.2    | AT1G76892.1 | 0.80                     | 1.02          | AT1G76890                            |
| 0.9 $\leq$ F < 1.2    | AT2G14115.1 | 1.31                     | 1.07          | AT2G14120                            |
| 0.9 $\leq$ F < 1.2    | AT2G18440.1 | 1.12                     | 1.08          |                                      |
| 0.9 $\leq$ F < 1.2    | AT2G18735.1 | 1.11                     | 0.97          |                                      |
| 0.9 $\leq$ F < 1.2    | AT2G22821.1 | 1.42                     | 0.98          | AT2G22820                            |



| Category <sup>†</sup> | AGI code    | Fold change <sup>‡</sup> |               | Sense gene <sup>§</sup> |
|-----------------------|-------------|--------------------------|---------------|-------------------------|
|                       |             | <i>upf3-1</i>            | <i>upf1-1</i> |                         |
| 0.9 ≤ F < 1.2         | AT2G41312.1 | 0.92                     | 0.96          |                         |
| 0.9 ≤ F < 1.2         | AT2G43375.1 | 1.03                     | 1.01          |                         |
| 0.9 ≤ F < 1.2         | AT2G45315.1 | 1.16                     | 1.01          | AT2G45310               |
| 0.9 ≤ F < 1.2         | AT2G46192.1 | 1.31                     | 1.05          |                         |
| 0.9 ≤ F < 1.2         | AT3G13061.1 | 1.14                     | 1.06          | AT3G13060               |
| 0.9 ≤ F < 1.2         | AT3G13277.1 | 1.09                     | 0.96          |                         |
| 0.9 ≤ F < 1.2         | AT3G51075.1 | 1.42                     | 1.16          | AT3G51070               |
| 0.9 ≤ F < 1.2         | AT3G52605.1 | 0.98                     | 1.17          | AT3G52610               |
| 0.9 ≤ F < 1.2         | AT3G54625.1 | 0.75                     | 1.07          | AT3G54630               |
| 0.9 ≤ F < 1.2         | AT3G62895.1 | 1.22                     | 1.08          |                         |
| 0.9 ≤ F < 1.2         | AT4G01593.1 | 1.01                     | 0.98          | AT4G01595               |
| 0.9 ≤ F < 1.2         | AT4G08035.1 | 1.32                     | 1.16          |                         |
| 0.9 ≤ F < 1.2         | AT4G17098.1 | 1.04                     | 0.97          | AT4G17100               |
| 0.9 ≤ F < 1.2         | AT4G40065.1 | 1.00                     | 1.08          |                         |
| 0.9 ≤ F < 1.2         | AT5G18245.1 | 1.20                     | 0.93          | AT5G18240               |
| 0.9 ≤ F < 1.2         | AT5G19221.1 | 1.12                     | 0.92          | AT5G19220               |
| 0.9 ≤ F < 1.2         | AT5G41612.1 | 1.35                     | 0.96          | AT5G41610               |
| 0.9 ≤ F < 1.2         | AT5G63195.1 | 1.09                     | 1.07          | AT5G63190               |
| 0.9 ≤ F < 1.2         | AT5G66558.1 | 1.22                     | 1.19          | AT5G66560               |
| 0.6 ≤ F < 0.9         | AT1G11185.1 | 1.00                     | 0.86          |                         |
| 0.6 ≤ F < 0.9         | AT1G26218.1 | 0.77                     | 0.77          | AT1G26220               |
| 0.6 ≤ F < 0.9         | AT1G31935.1 | 0.91                     | 0.86          |                         |
| 0.6 ≤ F < 0.9         | AT1G69572.1 | 0.71                     | 0.87          | AT1G69570               |
| 0.6 ≤ F < 0.9         | AT2G21187.1 | 1.36                     | 0.89          | AT2G21185               |
| 0.6 ≤ F < 0.9         | AT2G30362.1 | 1.35                     | 0.85          | AT2G30360               |
| 0.6 ≤ F < 0.9         | AT3G05905.1 | 0.66                     | 0.71          | AT3G05900               |
| 0.6 ≤ F < 0.9         | AT3G07215.1 | 0.87                     | 0.82          |                         |
| 0.6 ≤ F < 0.9         | AT3G12965.1 | 0.98                     | 0.83          |                         |
| 0.6 ≤ F < 0.9         | AT3G14172.1 | 0.93                     | 0.87          |                         |
| 0.6 ≤ F < 0.9         | AT4G15242.1 | 0.96                     | 0.86          |                         |
| 0.6 ≤ F < 0.9         | AT4G26488.1 | 0.75                     | 0.67          | AT4G26490               |
| 0.6 ≤ F < 0.9         | AT4G36648.1 | 0.77                     | 0.76          |                         |
| 0.6 ≤ F < 0.9         | AT5G07322.1 | 0.67                     | 0.77          |                         |
| 0.6 ≤ F < 0.9         | AT5G28262.1 | 0.95                     | 0.79          |                         |
| 0.6 ≤ F < 0.9         | AT5G67488.1 | 1.16                     | 0.72          | AT5G67490               |
| 0 ≤ F < 0.6           | AT2G13431.1 | 1.00                     | 0.50          | AT2G13430               |
| 0 ≤ F < 0.6           | AT4G20362.1 | 0.67                     | 0.59          | AT4G20360               |

<sup>†</sup>We classified the AGI miRNAs into 6 groups based on the fold (F) changes.

<sup>‡</sup>{Signal Intensity (HLE values) of each gene in *upf1-1* or *upf3-1*} ÷ {Signal Intensity (HLE values) of each gene in wild type}.

<sup>§</sup>These represent the sense genes overlapping more than one base with nat-RNAs.

Table S5. Non-AGI TUs up-regulated in *upf1-1*

| Group ID <sup>†</sup> | Chr | Strand | Start    | End      | Fold change <sup>‡</sup> |               | Sense gene <sup>§</sup> | nat-RNA <sup>  </sup> | incRNA <sup>  </sup> |
|-----------------------|-----|--------|----------|----------|--------------------------|---------------|-------------------------|-----------------------|----------------------|
|                       |     |        |          |          | <i>upf1-1</i>            | <i>upf3-1</i> |                         |                       |                      |
| <b>Group64</b>        | 1   | +      | 1645624  | 1647236  | 1.99                     | 1.91          | AT1G05560               | *                     |                      |
| Group70               | 1   | +      | 1820521  | 1821900  | 3.50                     | 3.90          | AT1G06000               | *                     |                      |
| Group78               | 1   | +      | 2034228  | 2035826  | 1.83                     | 1.62          |                         |                       | **                   |
| Group111              | 1   | -      | 2718591  | 2722018  | 1.89                     | 2.12          | AT1G08590               | *                     |                      |
| Group172              | 1   | +      | 4478273  | 4483579  | 1.82                     | 1.56          | AT1G13140,<br>AT1G13150 | *                     |                      |
| Group289              | 1   | -      | 7892669  | 7894604  | 2.18                     | 2.11          |                         |                       | **                   |
| Group308              | 1   | +      | 8188317  | 8189046  | 2.63                     | 2.08          | AT1G23090               | *                     |                      |
| Group314              | 1   | +      | 8331054  | 8332295  | 1.98                     | 1.49          |                         |                       | **                   |
| Group397              | 1   | -      | 11553272 | 11556478 | 2.04                     | 2.32          | AT1G32120               | *                     |                      |
| Group417              | 1   | +      | 12418474 | 12422531 | 2.60                     | 1.96          | AT1G34110               | *                     |                      |
| Group435              | 1   | +      | 13899763 | 13901248 | 2.16                     | 3.00          | AT1G36730,<br>AT1G36732 | *                     |                      |
| <b>Group475</b>       | 1   | +      | 17395028 | 17395388 | 2.57                     | 0.32          |                         |                       | **                   |
| Group597              | 1   | -      | 21583385 | 21584033 | 2.40                     | 1.85          |                         |                       | **                   |
| Group725              | 1   | +      | 26075985 | 26078064 | 2.15                     | 1.78          | AT1G69360               | *                     |                      |
| <b>Group764</b>       | 1   | +      | 27213554 | 27216358 | 2.17                     | 1.63          | AT1G72270,<br>AT1G72280 | *                     |                      |
| <b>Group818</b>       | 1   | -      | 28518919 | 28519508 | 12.14                    | 12.89         |                         |                       | **                   |
| Group906              | 2   | +      | 280092   | 281191   | 1.92                     | 1.47          | AT2G01630,<br>AT2G01630 | *                     |                      |
| Group920              | 2   | +      | 565065   | 566083   | 2.07                     | 1.46          |                         |                       | **                   |
| Group946              | 2   | +      | 1930928  | 1934140  | 1.84                     | 1.36          | AT2G05310               | *                     |                      |
| Group998              | 2   | +      | 3417677  | 3426149  | 1.82                     | 1.06          |                         |                       | **                   |
| Group1026             | 2   | +      | 5016329  | 5017063  | 5.41                     | 1.04          |                         |                       | **                   |
| <b>Group1027</b>      | 2   | +      | 5056815  | 5057527  | 2.47                     | 2.22          | AT2G12461,<br>AT2G12462 | *                     |                      |
| <b>Group1060</b>      | 2   | +      | 6673676  | 6675345  | 2.40                     | 1.90          | AT2G15320               | *                     |                      |
| Group1112             | 2   | +      | 8360362  | 8362997  | 1.84                     | 1.64          |                         |                       | **                   |
| Group1159             | 2   | +      | 9510657  | 9511674  | 3.05                     | 2.99          |                         |                       | **                   |
| Group1168             | 2   | +      | 9749641  | 9750442  | 3.07                     | 2.65          | AT2G22890               | *                     |                      |
| Group1280             | 2   | +      | 13116951 | 13117378 | 6.57                     | 2.18          | AT2G30770               | *                     |                      |
| Group1320             | 2   | +      | 14126621 | 14128768 | 1.96                     | 2.00          | AT2G33320               | *                     |                      |
| Group1387             | 2   | +      | 15680729 | 15682953 | 2.07                     | 1.89          | AT2G37360               | *                     |                      |
| Group1413             | 2   | -      | 16231245 | 16233757 | 2.88                     | 2.85          | AT2G38823,<br>AT2G38830 | *                     |                      |
| <b>Group1422</b>      | 2   | +      | 16453821 | 16456659 | 1.89                     | 1.57          | AT2G39380               | *                     |                      |
| <b>Group1595</b>      | 3   | +      | 1181672  | 1182897  | 2.14                     | 2.18          |                         |                       | **                   |
| Group1626             | 3   | +      | 1925573  | 1925958  | 2.91                     | 1.54          | AT3G06350               | *                     |                      |
| Group1825             | 3   | +      | 6057000  | 6061961  | 2.00                     | 1.66          |                         |                       | **                   |
| <b>Group1846</b>      | 3   | +      | 6714696  | 6716016  | 2.34                     | 2.22          | AT3G19380               | *                     |                      |
| Group1927             | 3   | -      | 9571587  | 9573211  | 2.41                     | 3.21          |                         |                       | **                   |
| Group2022             | 3   | +      | 16659289 | 16660857 | 2.98                     | 1.95          | AT3G45390               | *                     |                      |
| Group2032             | 3   | +      | 17171479 | 17172041 | 4.41                     | 2.44          | AT3G46610               | *                     |                      |
| <b>Group2035</b>      | 3   | -      | 17196438 | 17196895 | 3.01                     | 4.44          |                         |                       | **                   |
| Group2097             | 3   | +      | 19064514 | 19064961 | 3.06                     | 3.26          | AT3G51330               | *                     |                      |
| Group2100             | 3   | +      | 19108921 | 19111426 | 2.71                     | 2.34          | AT3G51470               | *                     |                      |
| Group2116             | 3   | -      | 19442399 | 19442794 | 4.29                     | 6.45          | AT3G52430               | *                     |                      |
| Group2188             | 3   | +      | 21161727 | 21162558 | 3.22                     | 3.96          | AT3G57140,<br>AT3G57140 | *                     |                      |
| Group2203             | 3   | -      | 21523010 | 21524842 | 2.12                     | 1.98          |                         |                       | **                   |
| Group2208             | 3   | -      | 21803147 | 21804844 | 2.22                     | 2.57          |                         |                       | **                   |
| <b>Group2217</b>      | 3   | -      | 22198312 | 22199541 | 2.02                     | 1.65          | AT3G60080               | *                     |                      |
| Group2224             | 3   | +      | 22586568 | 22588503 | 3.86                     | 3.35          |                         |                       | **                   |
| Group2246             | 3   | +      | 23133852 | 23134110 | 3.42                     | 1.35          |                         |                       | **                   |
| Group2263             | 3   | +      | 23438480 | 23440017 | 2.29                     | 1.91          | AT3G63450,<br>AT3G63450 | *                     |                      |
| <b>Group2316</b>      | 4   | -      | 1373192  | 1374593  | 3.71                     | 2.66          | AT4G03100               | *                     |                      |
| Group2353             | 4   | -      | 3356796  | 3357763  | 2.49                     | 1.54          | AT4G06534               | *                     |                      |
| Group2357             | 4   | +      | 3663458  | 3665878  | 2.01                     | 2.21          |                         |                       | **                   |
| <b>Group2368</b>      | 4   | +      | 5637690  | 5640685  | 1.85                     | 1.49          | AT4G08850,<br>AT4G08850 | *                     |                      |
| <b>Group2443</b>      | 4   | +      | 8035714  | 8038016  | 2.19                     | 1.55          |                         |                       | **                   |

| Group ID <sup>†</sup> | Chr | Strand | Start    | End      | Fold change <sup>‡</sup> |               | Sense gene <sup>§</sup>                             | nat-RNA <sup>¶</sup> | incRNA <sup>  </sup> |
|-----------------------|-----|--------|----------|----------|--------------------------|---------------|-----------------------------------------------------|----------------------|----------------------|
|                       |     |        |          |          | <i>upf1-1</i>            | <i>upf3-1</i> |                                                     |                      |                      |
| Group2466             | 4   | +      | 8852801  | 8855318  | 1.94                     | 1.63          | AT4G15490                                           | *                    |                      |
| Group2553             | 4   | +      | 12044238 | 12045716 | 2.18                     | 1.82          | AT4G22980                                           | *                    |                      |
| Group2556             | 4   | -      | 12152516 | 12153374 | 2.28                     | 1.70          |                                                     |                      | **                   |
| Group2600             | 4   | +      | 13243137 | 13245714 | 2.85                     | 1.90          | AT4G26140,<br>AT4G26140                             | *                    |                      |
| Group2607             | 4   | +      | 13413633 | 13416087 | 1.91                     | 2.73          | AT4G26590                                           | *                    |                      |
| Group2635             | 4   | +      | 14144297 | 14147590 | 2.06                     | 2.94          | AT4G28650                                           | *                    |                      |
| Group2702             | 4   | +      | 16102719 | 16104057 | 2.25                     | 1.70          | AT4G33470                                           | *                    |                      |
| Group2750             | 4   | +      | 17043854 | 17047333 | 2.95                     | 2.94          | AT4G36020,<br>AT4G36030                             | *                    |                      |
| Group2788             | 4   | +      | 17944581 | 17946703 | 2.51                     | 2.44          | AT4G38300                                           | *                    |                      |
| Group2863             | 5   | +      | 1206258  | 1206922  | 2.47                     | 3.51          | AT5G04310                                           | *                    |                      |
| Group2870             | 5   | -      | 1341934  | 1343483  | 3.89                     | 4.26          |                                                     |                      | **                   |
| Group2871             | 5   | +      | 1354505  | 1355594  | 1.87                     | 2.10          | AT5G04700                                           | *                    |                      |
| <b>Group2938</b>      | 5   | +      | 2944341  | 2945426  | 1.91                     | 2.33          | AT5G09460,<br>AT5G09461,<br>AT5G09462,<br>AT5G09463 | *                    |                      |
| Group3010             | 5   | +      | 4841235  | 4842091  | 3.23                     | 2.40          | AT5G14950                                           | *                    |                      |
| Group3094             | 5   | +      | 7417960  | 7421219  | 2.19                     | 1.71          | AT5G22390                                           | *                    |                      |
| Group3235             | 5   | +      | 16051737 | 16056185 | 2.19                     | 2.11          |                                                     |                      | **                   |
| Group3284             | 5   | +      | 17348269 | 17348857 | 2.99                     | 1.84          | AT5G43170                                           | *                    |                      |
| Group3305             | 5   | -      | 17983301 | 17983778 | 2.21                     | 1.71          |                                                     |                      | **                   |
| <b>Group3331</b>      | 5   | +      | 18787333 | 18787793 | 2.46                     | 2.92          | AT5G46280                                           | *                    |                      |
| Group3418             | 5   | +      | 21957534 | 21958857 | 2.69                     | 2.12          | AT5G54067                                           | *                    |                      |
| <b>Group3551</b>      | 5   | +      | 25747745 | 25748963 | 1.99                     | 2.37          | AT5G64340,<br>AT5G64341,<br>AT5G64342,<br>AT5G64343 | *                    |                      |
| <b>Group3567</b>      | 5   | +      | 26179117 | 26180563 | 2.31                     | 2.29          | AT5G65460                                           | *                    |                      |
| Group3580             | 5   | +      | 26553549 | 26554027 | 2.77                     | 3.44          |                                                     |                      | **                   |

<sup>†</sup>When the non-AGI TUs, which are located on same strand of the genome, overlapped each other by >1 base, they were classified into the same group. The groups marked by bold characters include short segment(s) of the repeat sequence(s) originated from transposable or retrotransposable elements (E-value < 0.01).

<sup>‡</sup>{Signal Intensity (HLE values) of each gene in *upf1-1* or *upf3-1*} ÷ {Signal Intensity (HLE values) of each gene in wild type}.

<sup>§</sup>These represent the sense genes overlapping >1 base with non-AGI TUs.

<sup>¶</sup>TUs for putative nat-RNAs are marked by asterisks.

<sup>||</sup>TUs for putative incRNAs are marked by double asterisks.

Table S6. Non-AGI TUs up-regulated in *upf3-1*

| Group ID <sup>†</sup> | Chr | Strand | Start    | End      | Fold change <sup>‡</sup> |               | Sense gene <sup>§</sup>               | nat-RNA <sup>¶</sup> | incRNA <sup>  </sup> |
|-----------------------|-----|--------|----------|----------|--------------------------|---------------|---------------------------------------|----------------------|----------------------|
|                       |     |        |          |          | <i>upf3-1</i>            | <i>upf1-1</i> |                                       |                      |                      |
| Group47               | 1   | +      | 1128522  | 1129624  | 2.01                     | 1.58          | AT1G04240                             | *                    |                      |
| <b>Group64</b>        | 1   | +      | 1645624  | 1647236  | 1.91                     | 1.99          | AT1G05560                             | *                    |                      |
| Group70               | 1   | +      | 1820521  | 1821900  | 3.90                     | 3.50          | AT1G06000                             | *                    |                      |
| Group111              | 1   | -      | 2718591  | 2722018  | 2.12                     | 1.89          | AT1G08590                             | *                    |                      |
| Group289              | 1   | -      | 7892669  | 7894604  | 2.11                     | 2.18          |                                       |                      | **                   |
| Group308              | 1   | +      | 8188317  | 8189046  | 2.08                     | 2.63          | AT1G23090                             | *                    |                      |
| Group384              | 1   | +      | 11134450 | 11134878 | 2.55                     | 1.96          |                                       |                      | **                   |
| Group397              | 1   | -      | 11553272 | 11556478 | 2.32                     | 2.04          | AT1G32120                             | *                    |                      |
| Group417              | 1   | +      | 12418474 | 12422531 | 1.96                     | 2.60          | AT1G34110                             | *                    |                      |
| Group435              | 1   | +      | 13899763 | 13901248 | 3.00                     | 2.16          | AT1G36730,<br>AT1G36732               | *                    |                      |
| Group643              | 1   | +      | 23459834 | 23460893 | 2.24                     | 1.57          | AT1G63240                             | *                    |                      |
| <b>Group722</b>       | 1   | -      | 26040803 | 26041163 | 6.98                     | 3.57          | AT1G69252                             | *                    |                      |
| Group757              | 1   | +      | 26937061 | 26938995 | 1.94                     | 1.87          | AT1G71490                             | *                    |                      |
| <b>Group816</b>       | 1   | +      | 28467918 | 28471284 | 1.87                     | 1.68          | AT1G75820                             | *                    |                      |
| <b>Group818</b>       | 1   | -      | 28518919 | 28519508 | 12.89                    | 12.14         |                                       |                      | **                   |
| <b>Group1027</b>      | 2   | +      | 5056815  | 5057527  | 2.22                     | 2.47          | AT2G12461,<br>AT2G12462               | *                    |                      |
| <b>Group1039</b>      | 2   | +      | 5868669  | 5869613  | 2.39                     | 2.37          |                                       |                      | **                   |
| Group1052             | 2   | +      | 6510456  | 6513421  | 1.90                     | 1.47          | AT2G15029                             | *                    |                      |
| Group1159             | 2   | +      | 9510657  | 9511674  | 2.99                     | 3.05          |                                       |                      | **                   |
| Group1168             | 2   | +      | 9749641  | 9750442  | 2.65                     | 3.07          | AT2G22890                             | *                    |                      |
| Group1223             | 2   | -      | 11519957 | 11520505 | 4.82                     | 2.87          | AT2G26975                             | *                    |                      |
| Group1320             | 2   | +      | 14126621 | 14128768 | 2.00                     | 1.96          | AT2G33320                             | *                    |                      |
| Group1387             | 2   | +      | 15680729 | 15682953 | 1.89                     | 2.07          | AT2G37360                             | *                    |                      |
| Group1413             | 2   | -      | 16231245 | 16233757 | 2.85                     | 2.88          | AT2G38823,<br>AT2G38830               | *                    |                      |
| Group1579             | 3   | +      | 794536   | 794819   | 3.47                     | 5.17          |                                       |                      | **                   |
| <b>Group1595</b>      | 3   | +      | 1181672  | 1182897  | 2.18                     | 2.14          |                                       |                      | **                   |
| Group1765             | 3   | +      | 4492977  | 4493563  | 3.38                     | 3.90          | AT3G13700,<br>AT3G13700,<br>AT3G13710 | *                    |                      |
| Group1926             | 3   | -      | 9557183  | 9558737  | 2.40                     | 1.99          |                                       |                      | **                   |
| Group1927             | 3   | -      | 9571587  | 9573211  | 3.21                     | 2.41          |                                       |                      | **                   |
| <b>Group2035</b>      | 3   | -      | 17196438 | 17196895 | 4.44                     | 3.01          |                                       |                      | **                   |
| Group2087             | 3   | +      | 18873130 | 18874112 | 1.87                     | 1.60          | AT3G50750                             | *                    |                      |
| Group2097             | 3   | +      | 19064514 | 19064961 | 3.26                     | 3.06          | AT3G51330                             | *                    |                      |
| Group2116             | 3   | -      | 19442399 | 19442794 | 6.45                     | 4.29          | AT3G52430                             | *                    |                      |
| Group2159             | 3   | +      | 20427473 | 20429724 | 3.03                     | 1.80          | AT3G55090                             | *                    |                      |
| Group2188             | 3   | +      | 21161727 | 21162558 | 3.96                     | 3.22          | AT3G57140,<br>AT3G57140               | *                    |                      |
| Group2208             | 3   | -      | 21803147 | 21804844 | 2.57                     | 2.22          |                                       |                      | **                   |
| Group2224             | 3   | +      | 22586568 | 22588503 | 3.35                     | 3.86          |                                       |                      | **                   |
| Group2263             | 3   | +      | 23438480 | 23440017 | 1.91                     | 2.29          | AT3G63450,<br>AT3G63450               | *                    |                      |
| Group2357             | 4   | +      | 3663458  | 3665878  | 2.21                     | 2.01          |                                       |                      | **                   |
| Group2600             | 4   | +      | 13243137 | 13245714 | 1.90                     | 2.85          | AT4G26140,<br>AT4G26140               | *                    |                      |
| Group2607             | 4   | +      | 13413633 | 13416087 | 2.73                     | 1.91          | AT4G26590                             | *                    |                      |
| Group2635             | 4   | +      | 14144297 | 14147590 | 2.94                     | 2.06          | AT4G28650                             | *                    |                      |
| Group2750             | 4   | +      | 17043854 | 17047333 | 2.94                     | 2.95          | AT4G36020,<br>AT4G36030               | *                    |                      |
| Group2770             | 4   | +      | 17616922 | 17617496 | 3.30                     | 2.89          | AT4G37470                             | *                    |                      |
| Group2788             | 4   | +      | 17944581 | 17946703 | 2.44                     | 2.51          | AT4G38300                             | *                    |                      |
| Group2860             | 5   | -      | 1151024  | 1152280  | 1.93                     | 1.47          | AT5G04190                             | *                    |                      |
| Group2863             | 5   | +      | 1206258  | 1206922  | 3.51                     | 2.47          | AT5G04310                             | *                    |                      |
| Group2870             | 5   | -      | 1341934  | 1343483  | 4.26                     | 3.89          |                                       |                      | **                   |
| Group2871             | 5   | +      | 1354505  | 1355594  | 2.10                     | 1.87          | AT5G04700                             | *                    |                      |
| Group2876             | 5   | -      | 1420729  | 1422576  | 3.31                     | 1.96          |                                       |                      | **                   |
| Group3235             | 5   | +      | 16051737 | 16056185 | 2.11                     | 2.19          |                                       |                      | **                   |
| Group3293             | 5   | -      | 17732973 | 17734732 | 1.87                     | 1.67          | AT5G44030                             | *                    |                      |
| Group3327             | 5   | -      | 18710198 | 18711386 | 2.31                     | 1.51          | AT5G46090                             | *                    |                      |
| <b>Group3331</b>      | 5   | +      | 18787333 | 18787793 | 2.92                     | 2.46          | AT5G46280                             | *                    |                      |

| Group ID <sup>†</sup> | Chr | Strand | Start    | End      | Fold change <sup>‡</sup> |               | Sense gene <sup>§</sup>                             | nat-RNA <sup>¶</sup> | incRNA <sup>  </sup> |
|-----------------------|-----|--------|----------|----------|--------------------------|---------------|-----------------------------------------------------|----------------------|----------------------|
|                       |     |        |          |          | <i>upf3-1</i>            | <i>upf1-1</i> |                                                     |                      |                      |
| Group3418             | 5   | +      | 21957534 | 21958857 | 2.12                     | 2.69          | AT5G54067                                           | *                    |                      |
| Group3477             | 5   | -      | 23862354 | 23864453 | 2.00                     | 1.63          | AT5G59070                                           | *                    |                      |
| <b>Group3551</b>      | 5   | +      | 25747745 | 25748963 | 2.37                     | 1.99          | AT5G64340,<br>AT5G64341,<br>AT5G64342,<br>AT5G64343 | *                    |                      |
| <b>Group3567</b>      | 5   | +      | 26179117 | 26180563 | 2.29                     | 2.31          | AT5G65460                                           | *                    |                      |
| Group3580             | 5   | +      | 26553549 | 26554027 | 3.44                     | 2.77          |                                                     |                      | **                   |

<sup>†</sup>When the non-AGI TUs, which are located on same strand of the genome, overlapped each other by >1 base, they were classified into the same group. The groups marked by bold characters include short segment(s) of the repeat sequence(s) originated from transposable or retrotransposable elements (*E* value < 0.01).

<sup>‡</sup>{Signal Intensity (HLE values) of each gene in *upf1-1* or *upf3-1*} ÷ {Signal Intensity (HLE values) of each gene in wild type}.

<sup>§</sup>These represent the sense genes overlapping more than one base with non-AGI TUs.

<sup>¶</sup>TUs for putative nat-RNAs are marked by asterisks.

<sup>||</sup>TUs for putative incRNAs are marked by double asterisks.

**Table S7. List of the primers used in quantitative RT-PCR**

| Name               | Sequence                   |
|--------------------|----------------------------|
| At1g11592RTforward | CCTGCAAGATCAAGTCACAAAC     |
| At1g11592RTreverse | CCAACAGATGTTATGACTCAAGC    |
| At1g22403RTforward | TGTTTGGCCTGAATTGTGACATG    |
| At1g22403RTreverse | CGAATGAGATGATGCGTTGTG      |
| At1g24148RTforward | GAACAAGAAAGGTAATGGCTTCG    |
| At1g24148RTreverse | CACAACGTTGGGTGGTAACG       |
| At1g69252RTforward | GGCTTCGTCGACATATATTGG      |
| At1g69252RTreverse | GAAAGAGCTTTGAATCTTCATCTC   |
| At2g32795RTforward | AGAGACGATGACGTATCACG       |
| At2g32795RTreverse | CTCCTCAACGATTACTCTCCA      |
| At3g04485RTforward | CTCATCTTCTGGTTCGTTACC      |
| At3g04485RTreverse | TAACACATACCCTGTACCAAG      |
| At3g26612RTforward | TAAAGTTATGGATAACAGAGGTCAG  |
| At3g26612RTreverse | ATTGGAACAACATCCATGAAAGG    |
| At4g06701RTforward | CAAGCTGCGACTCTGTGATC       |
| At4g06701RTreverse | GCCATTGCAAGAAGTACAAATCC    |
| At5g43403RTforward | GTGAAGCTTCCTGAGAACATTG     |
| At5g43403RTreverse | GCTTTCTAAAGGTATGAATCTAACC  |
| G818RTforward      | AACTCGTCTCTTCTCCTTCATG     |
| G818RTreverse      | CAATTATGGGTCAGGTCCATTAC    |
| G2870RTforward     | CGTGGAATTCATCAATAGGAGAC    |
| G2870RTreverse     | ATTCCGAGGTCGCTAGCCAA       |
| ACT2RTforward      | CTCAGGTATCGCTGACCGTATGAG   |
| ACT2RTreverse      | CTTGGAGATCCACATCTGCTGGAATG |

**Table S8. List of the primers used in 5'RACE-based quantitative RT-PCR**

| Name                            | Sequence                      |
|---------------------------------|-------------------------------|
| GeneRacer 5' Primer (F1)        | CGACTGGAGCACGAGGACACTGA       |
| GeneRacer 5' Nested Primer (F2) | GGACACTGACATGGACTGAAGGAGTA    |
| At1g07728R1                     | CCTAGCGAACCACTCCATTACGTTG     |
| At1g34844R1                     | GACTCTGCTTTCAAGACCAATTGTGC    |
| At1g48315R1                     | CGCTGGAATCAACTCTCAATCAACCA    |
| At1g60505R1                     | GCGAGTGTTGGAGATTGTTGAAATGGAG  |
| At1g60525R1                     | GTGTTCTTGAGTCGTTGGCAGGAATC    |
| At1g60545R1                     | GTGTTGCACGATGAGAATAAACCTGAGA  |
| At1g67792R1                     | CACCAACACAGAACAAAACCTACGAGATC |
| At2g24755R1                     | CTCCCGAAATAAGCGCATCTTTGAGAAG  |
| At2g35945R1                     | CAGCAGTTCGTCGGAATACCACTC      |
| At3g24518R1                     | TGATGCTCGAGAAAGAACGGACAAAGC   |
| At3g56408R1                     | TAATCCTGATGGAAGTCATCTGACGTG   |
| At4g37432R1                     | CTTACGGATGCTCACACGCCTCTCA     |
| At5g54569R1                     | GGGAATCAGGAAACTGGCAGTGTATG    |
| G2097R1                         | GTTGCAGAGAACTTCATGTCTGGCTAC   |
| G2116R1                         | CTCTCTACTCGATATCCAATCATGGACG  |
| G2188R1                         | CTTCACGGTTGTACCAGCATATCGTG    |
| G2750R1                         | GAGCGTTATGGAAACTCGCTGTAG      |
| ACT2R1                          | CTTGAGATCCACATCTGCTGGAATG     |
